# Supplementary material for: In vitro modeling of Batrachochytrium dendrobatidis infection of the amphibian skin
Source: PubMed Central journal article supplement (PMC6855447; doi:10.1371/journal.pone.0225224), 2019-11-14

# Negative control 4 hours sham infection

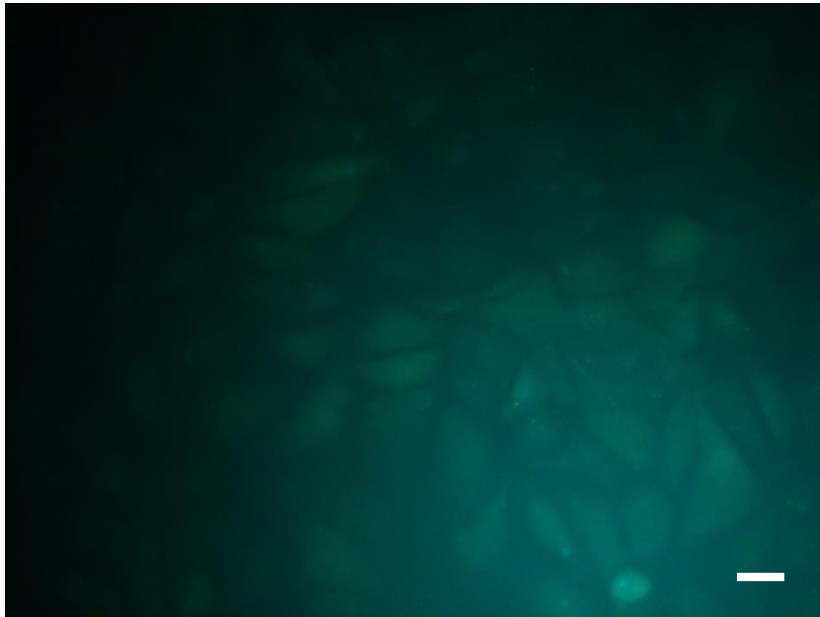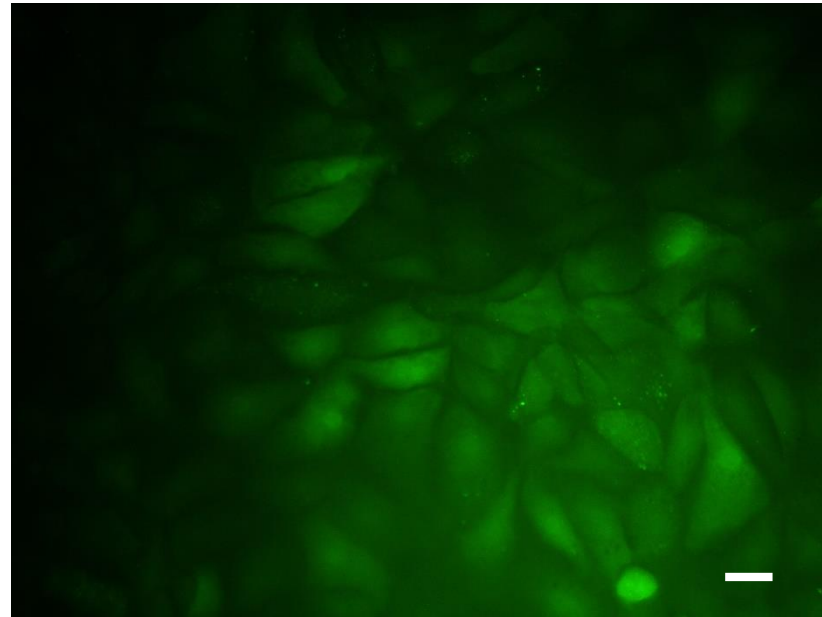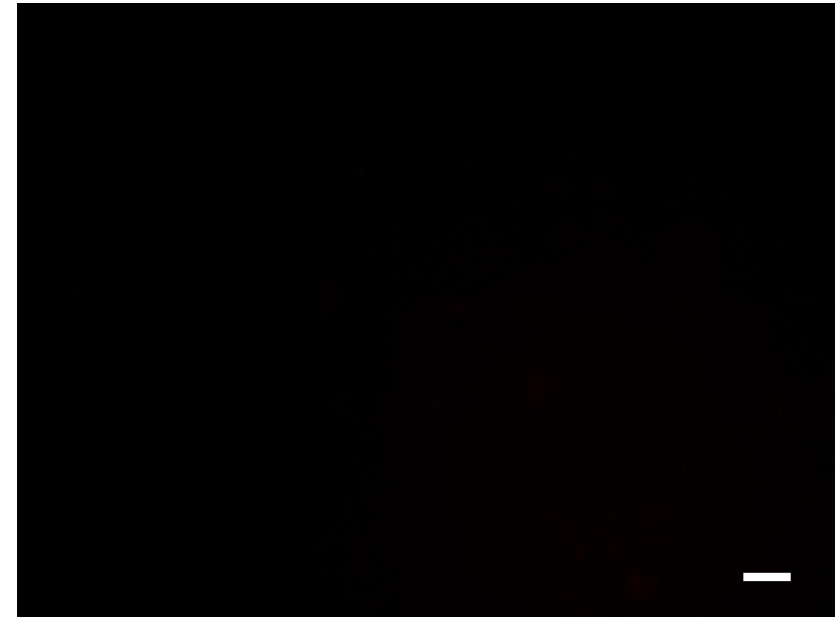

# Negative control day 1 sham infection

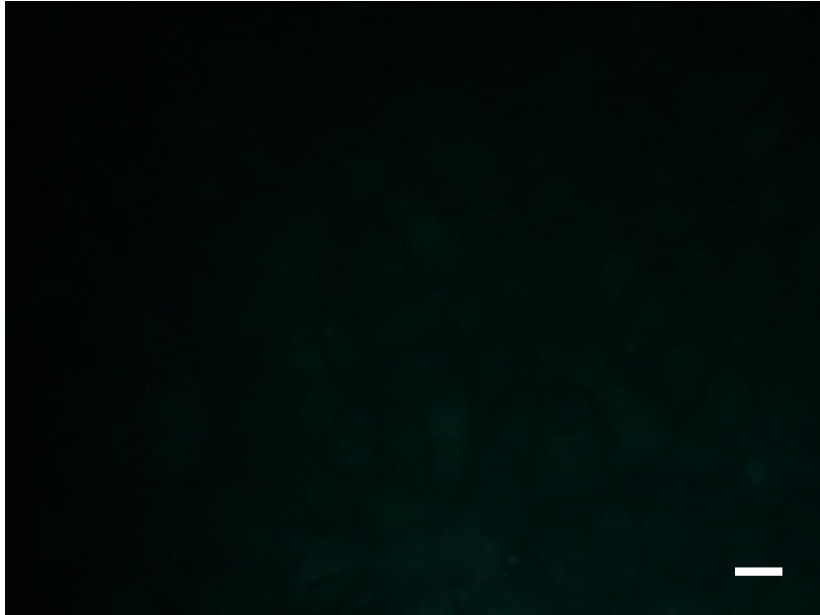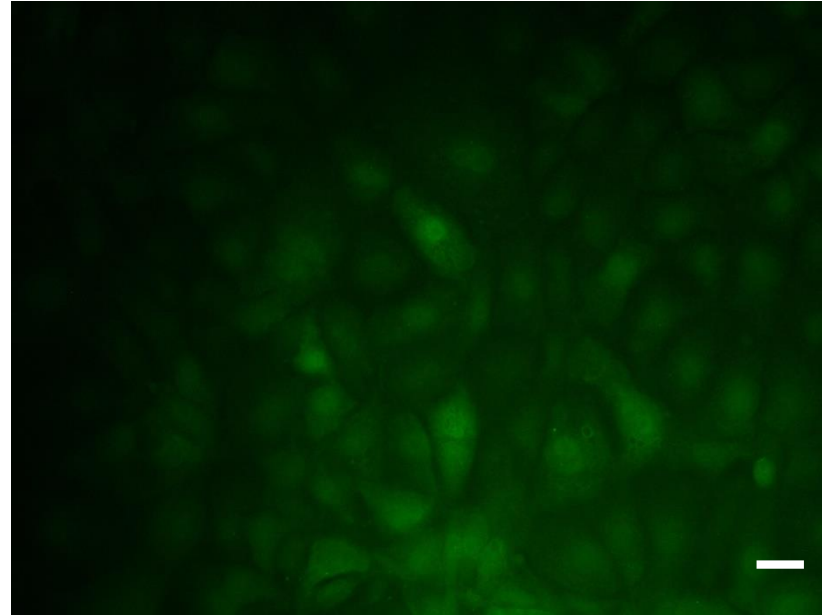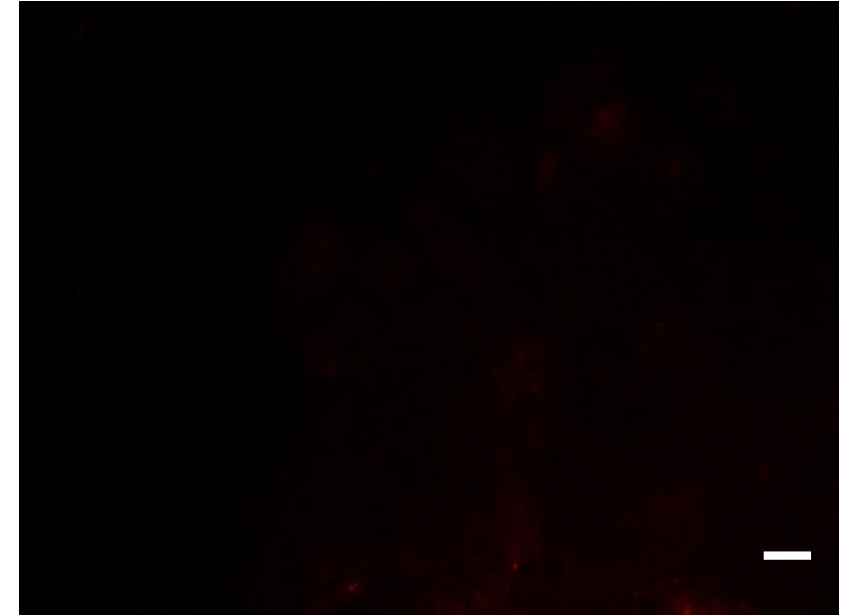

# Negative control day 2 sham infection

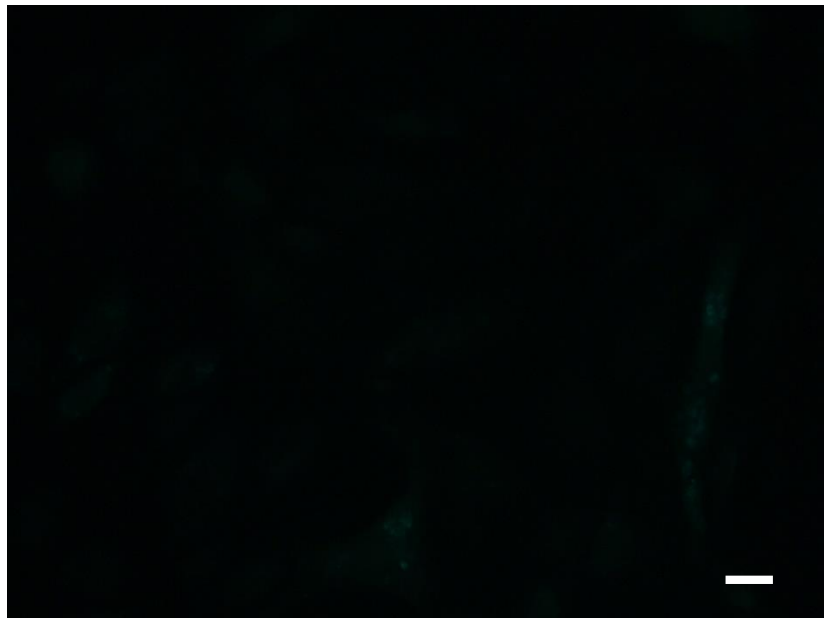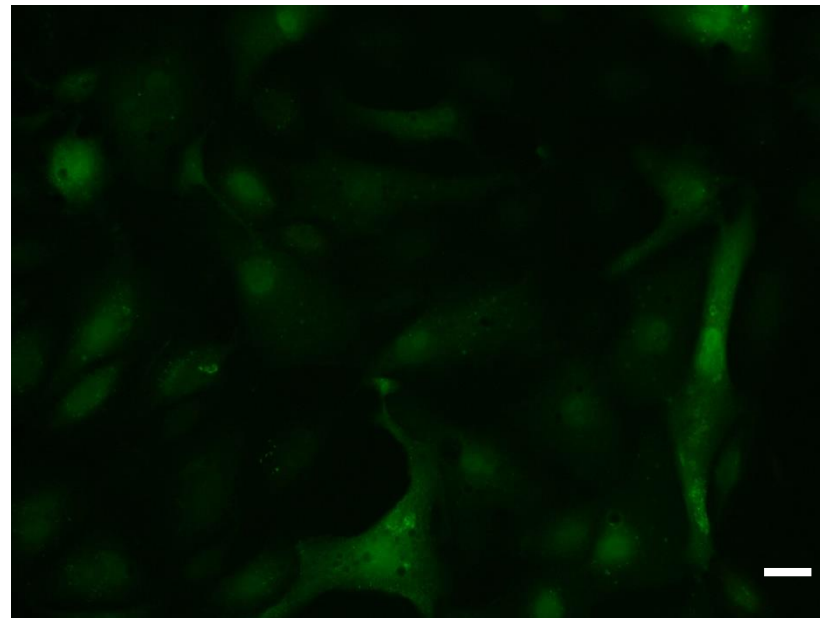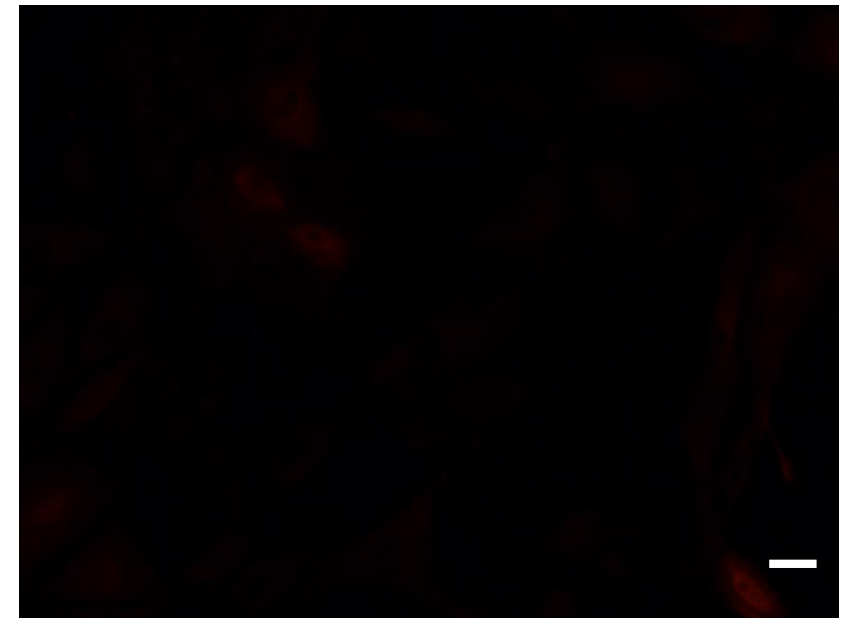

# Negative control day 3 sham infection

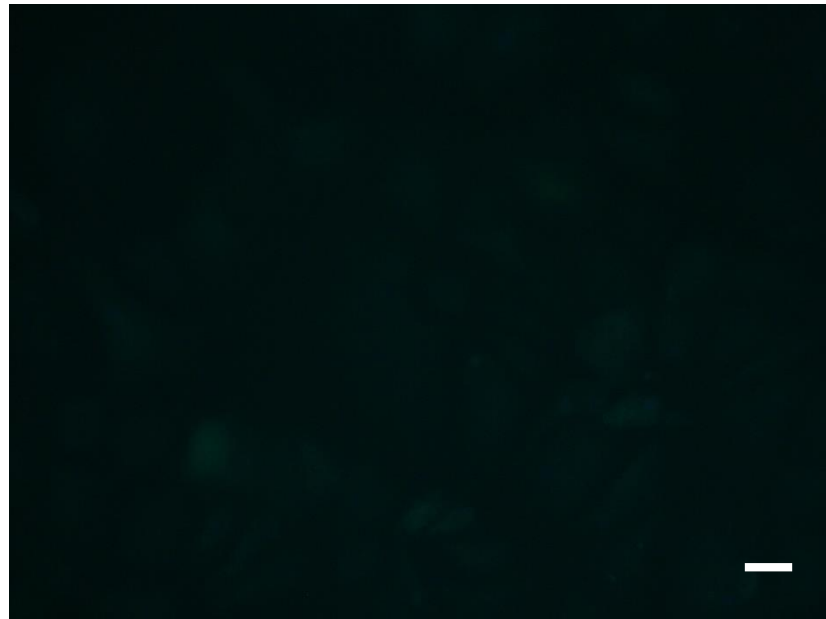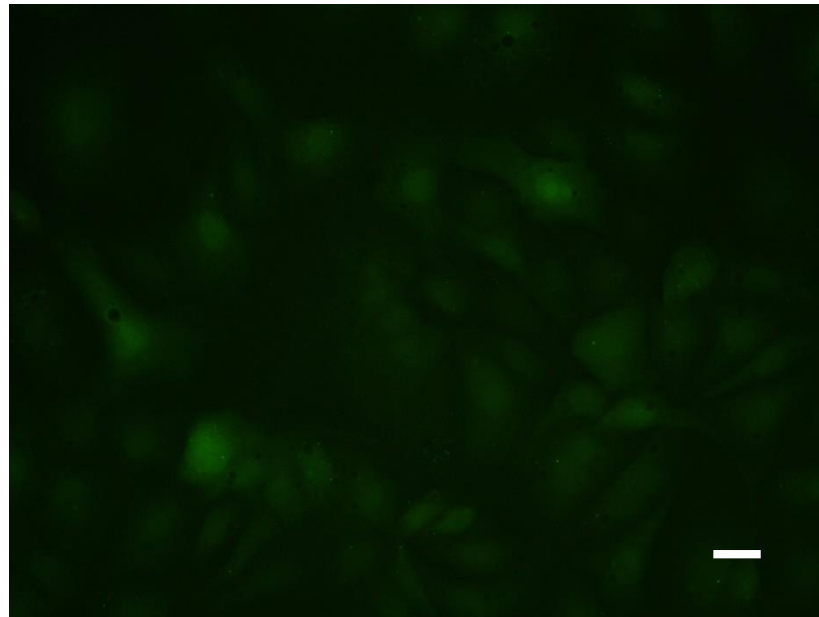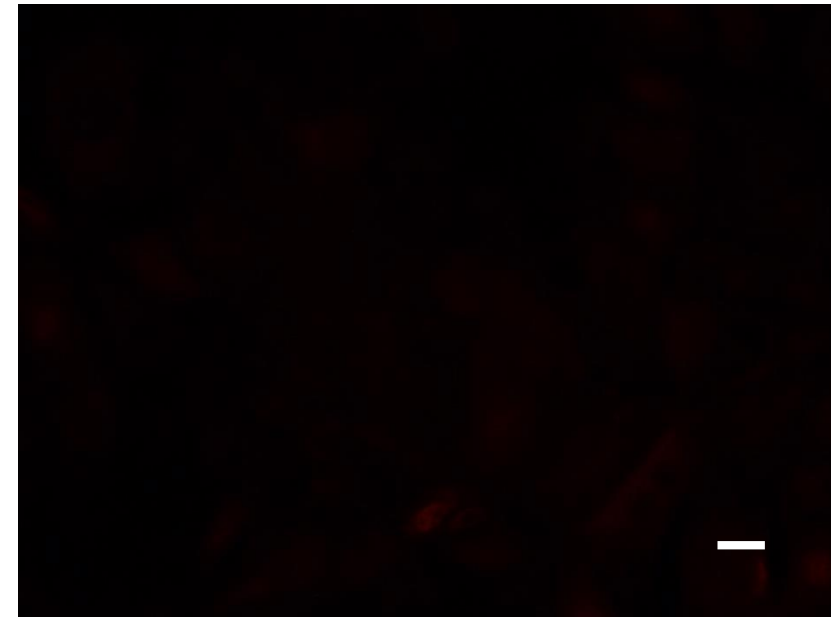

# Negative control day 4 sham infection

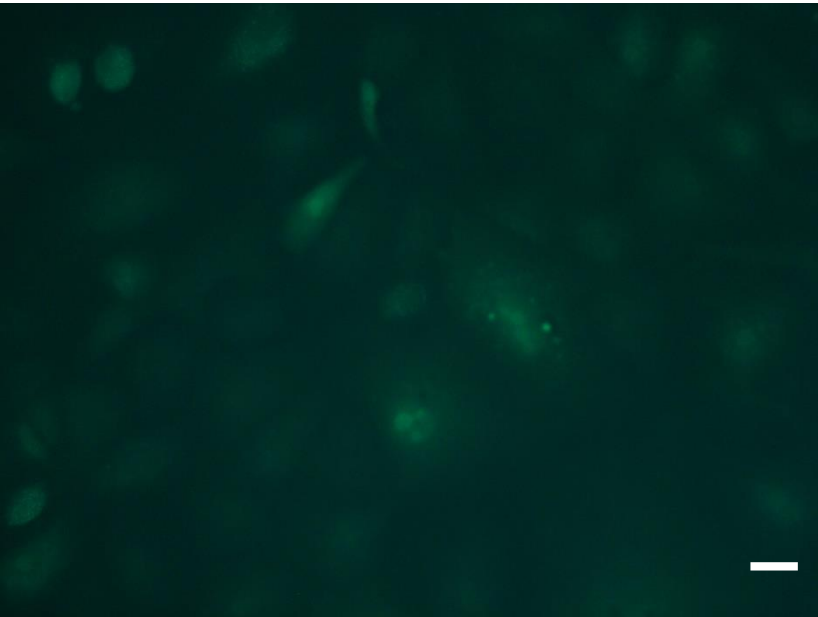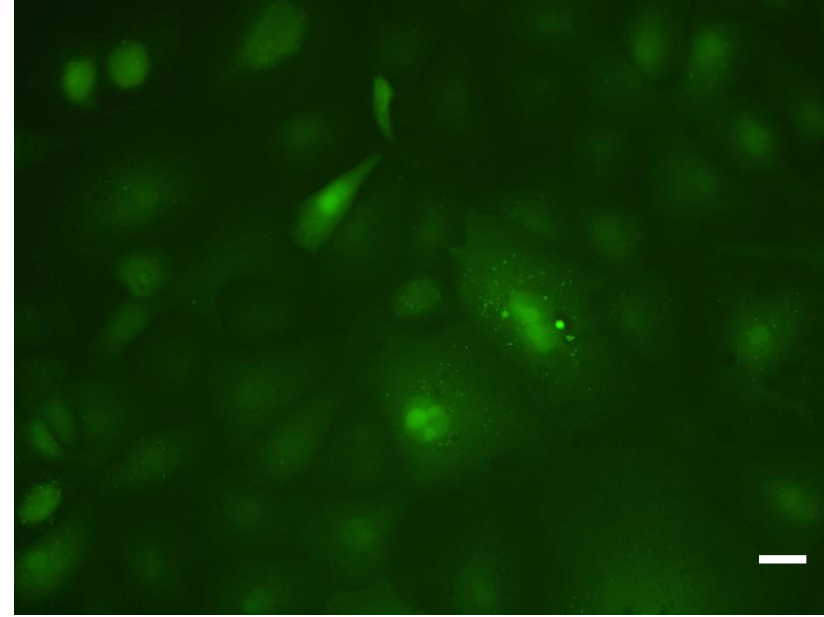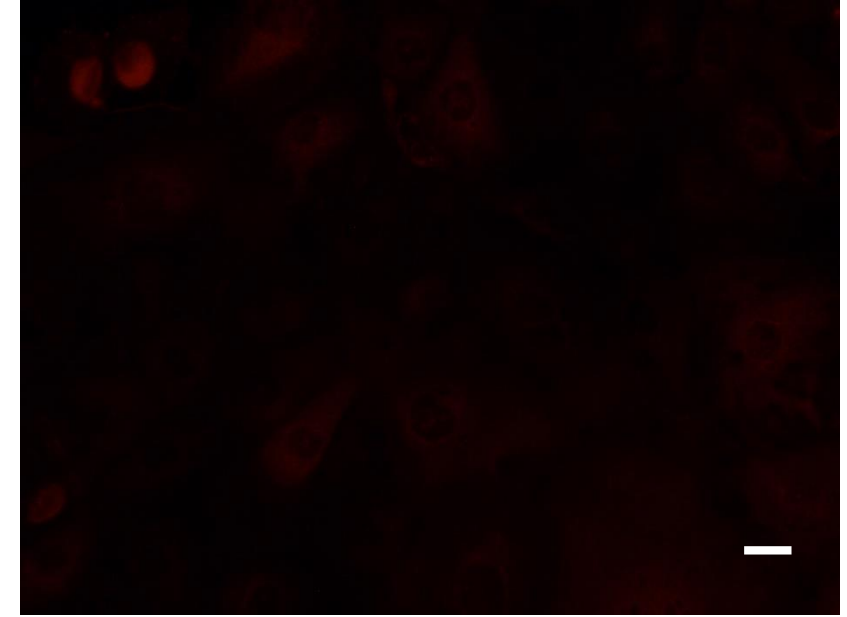

# Negative control day 5 sham infection

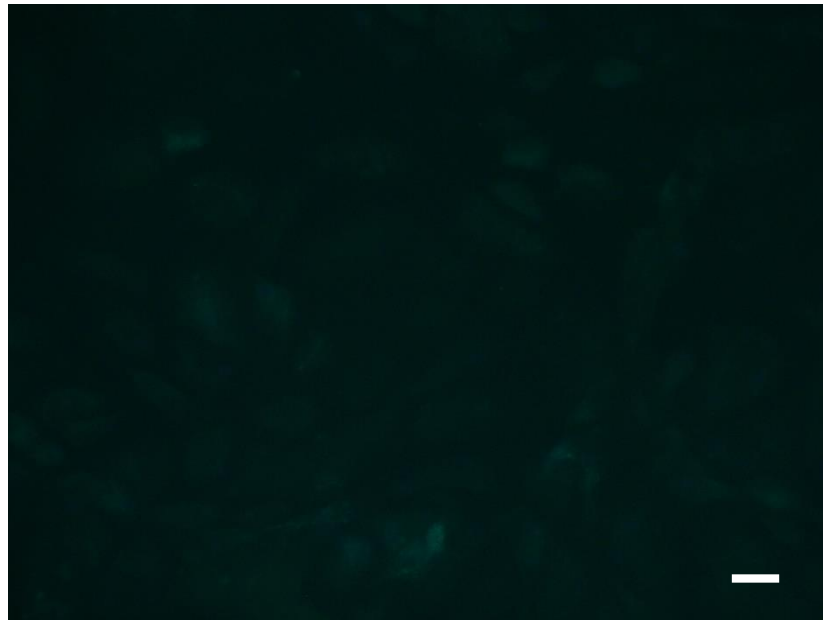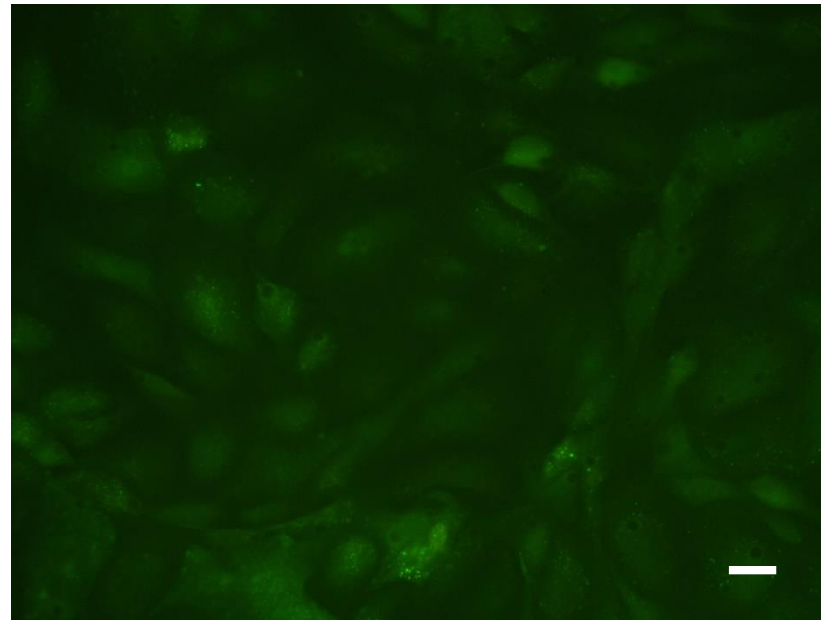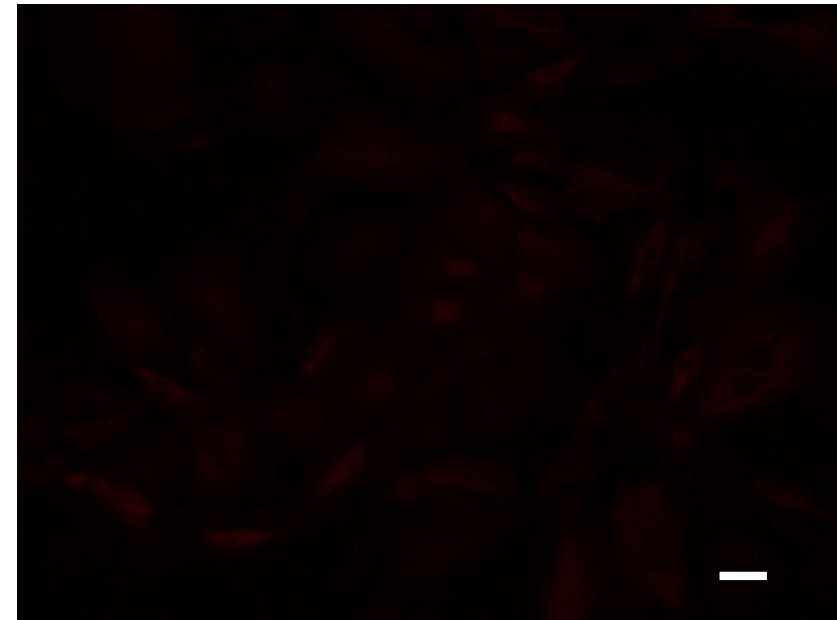

# Negative control day 6 sham infection

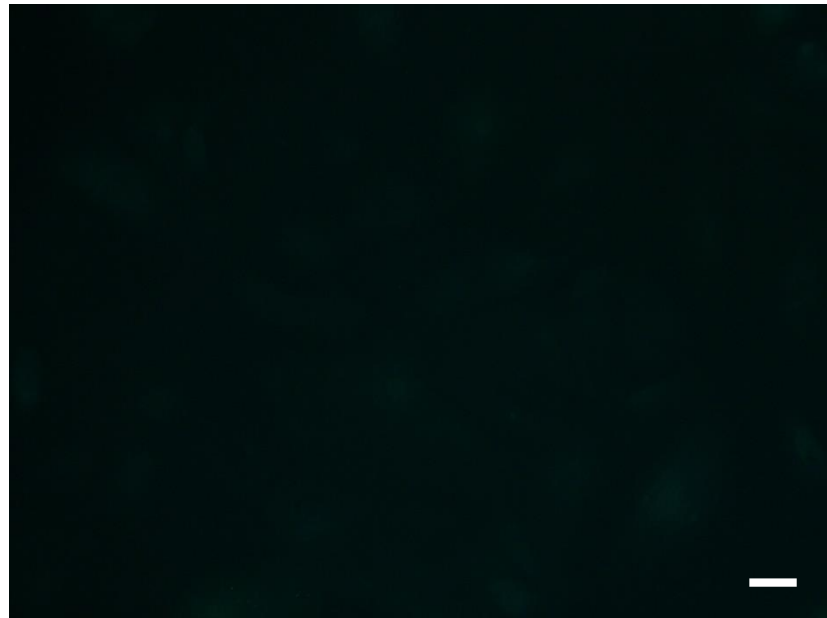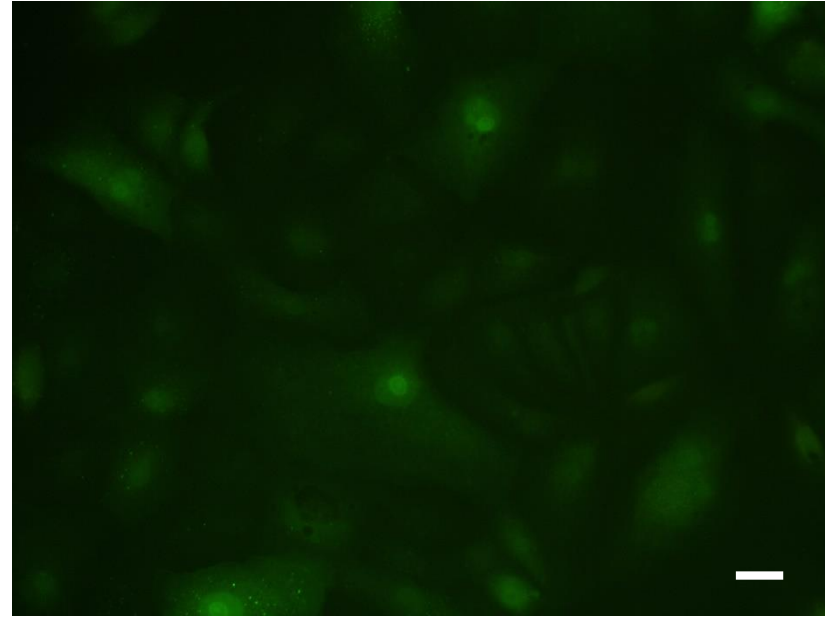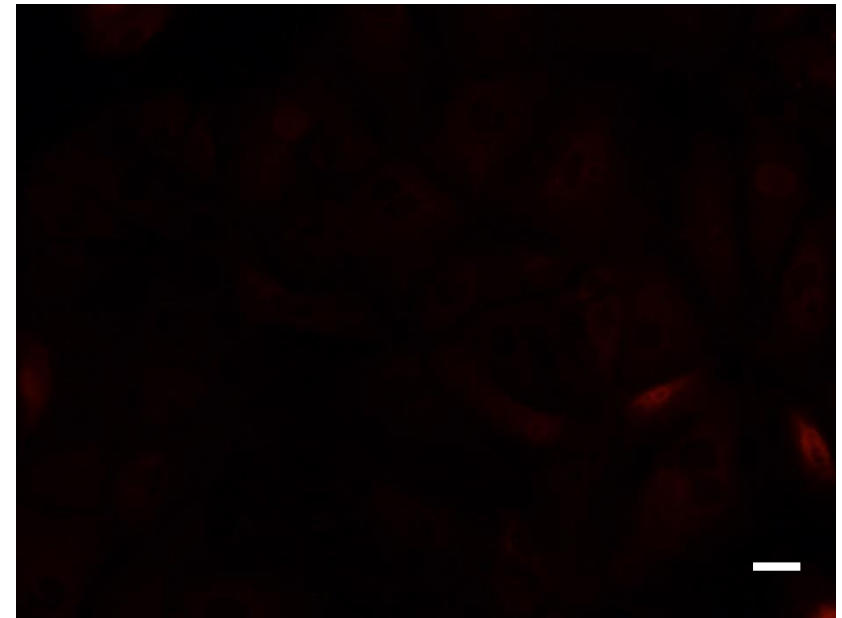

Supplement: pone.0225224.s001.pdf [file pone.0225224.s001.pdf]
