# Supplementary material for: In vitro modeling of Batrachochytrium dendrobatidis infection of the amphibian skin
Source: PubMed Central journal article supplement (PMC6855447; doi:10.1371/journal.pone.0225224), 2019-11-14

**Figure 3A**

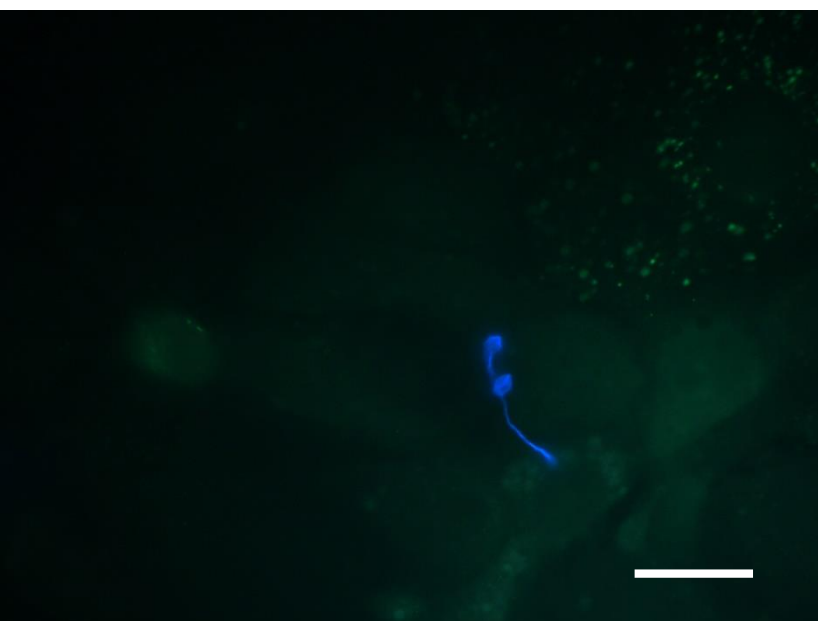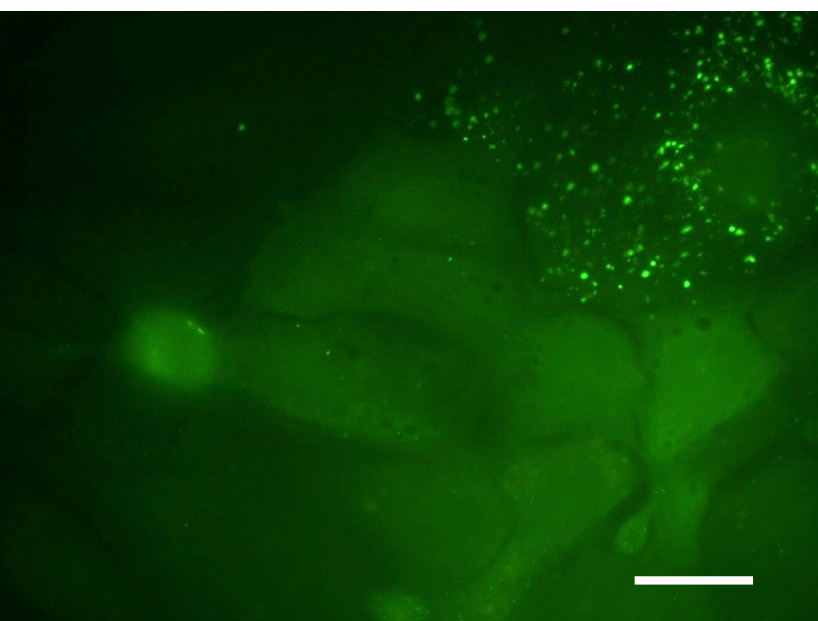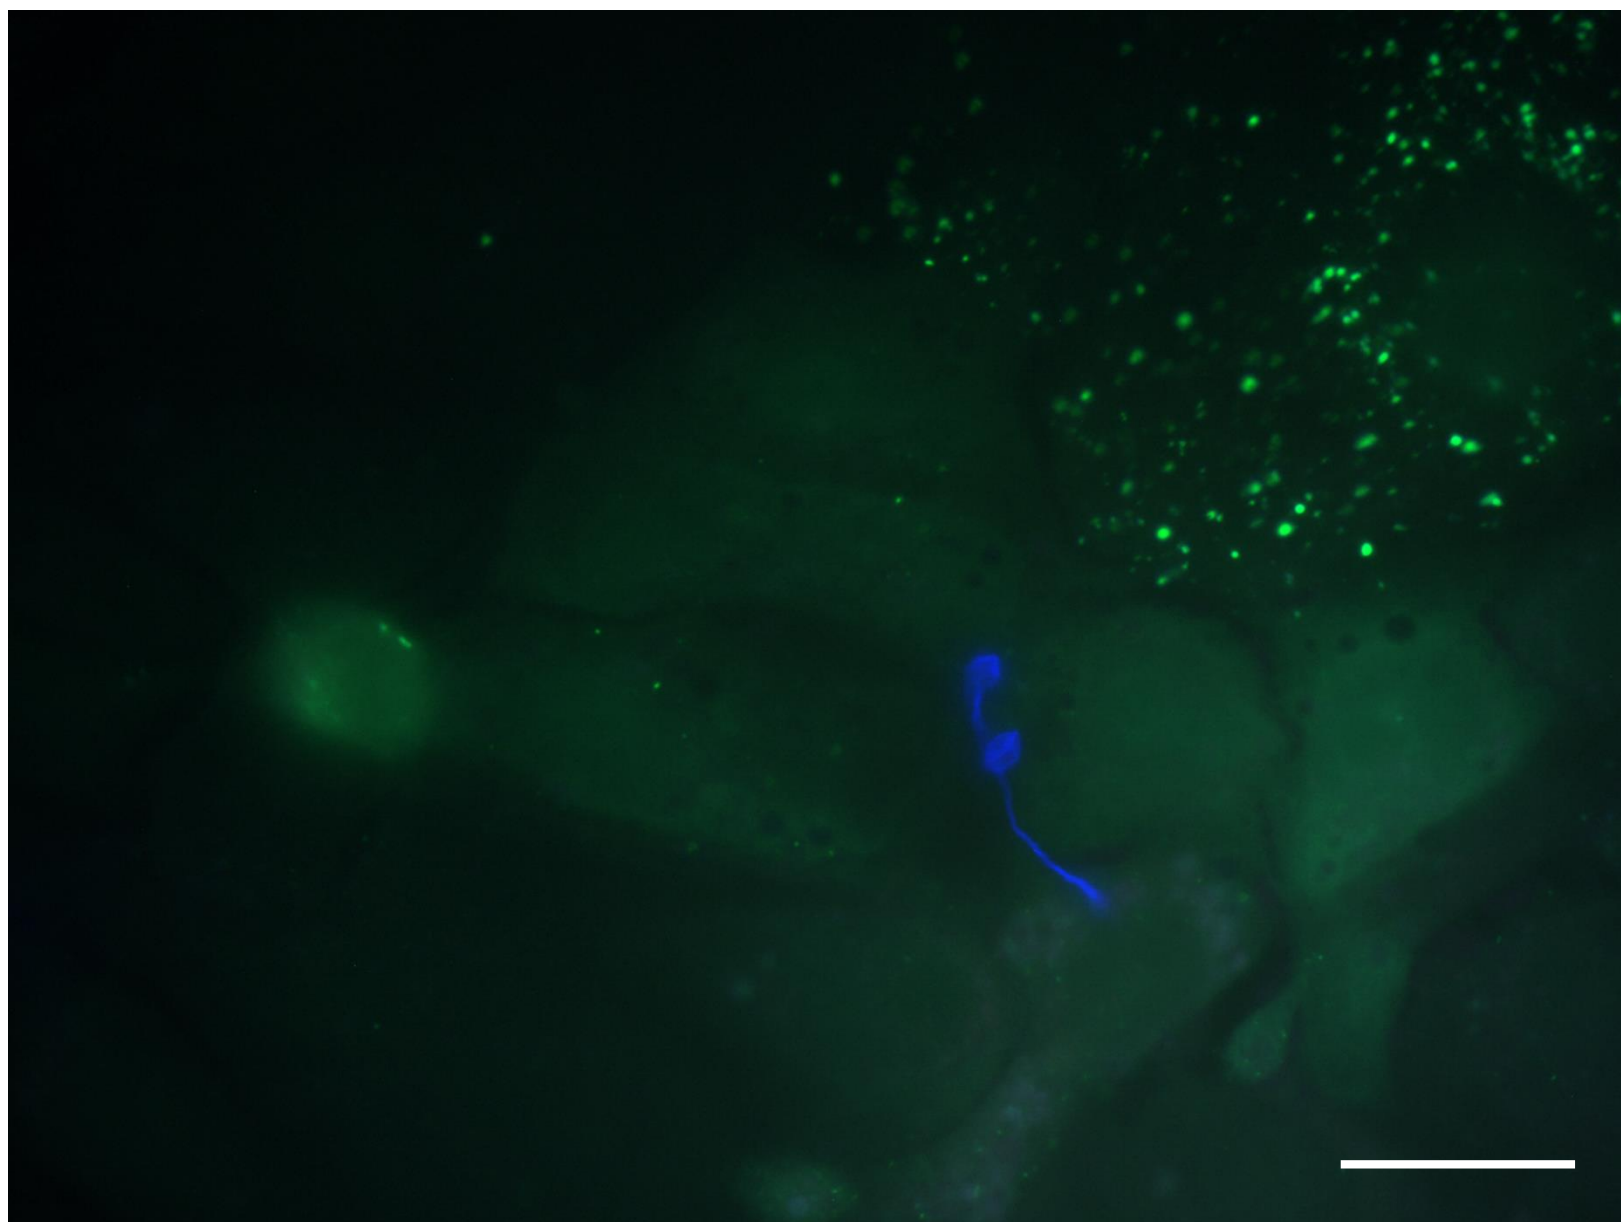

Figure 3B

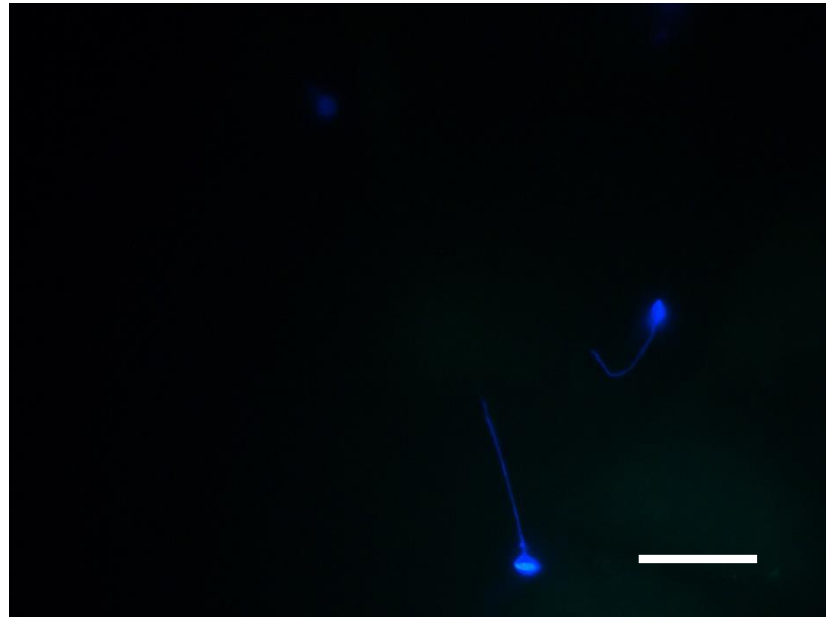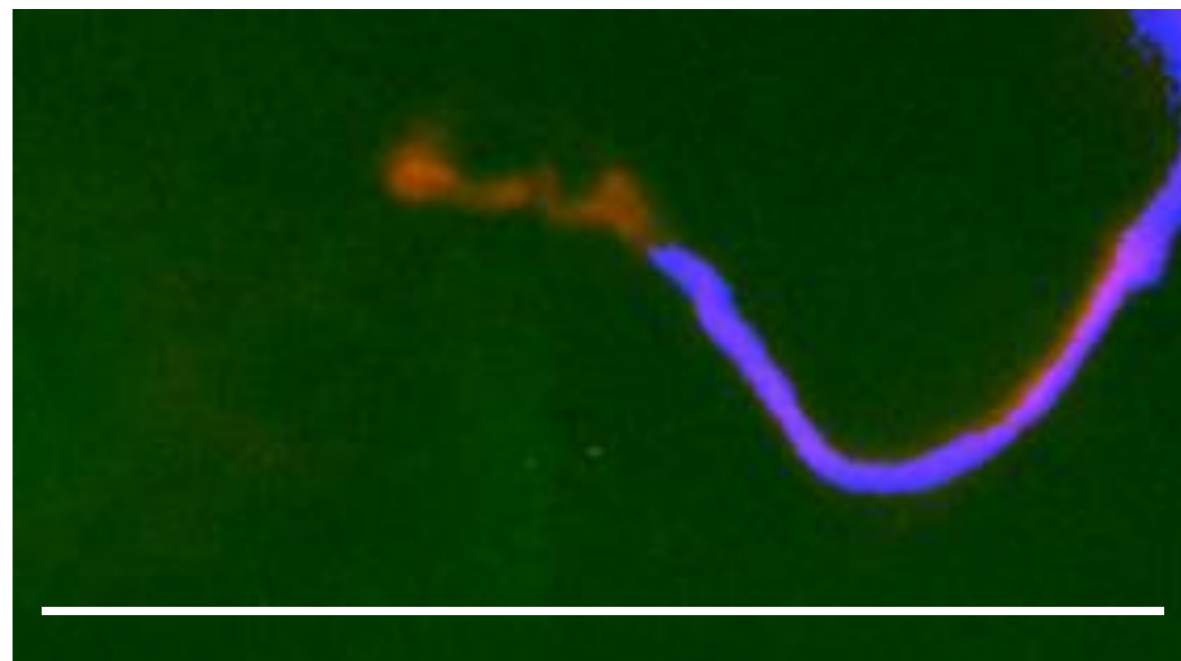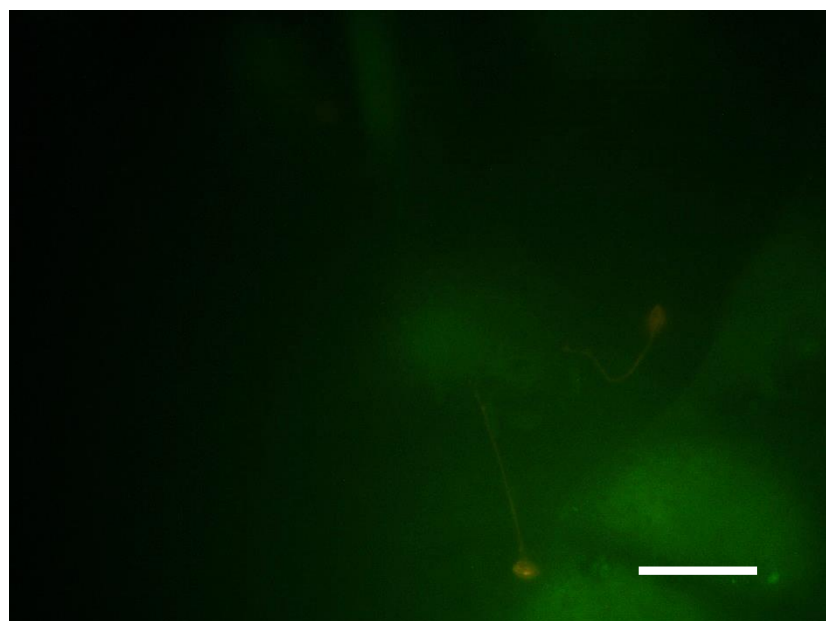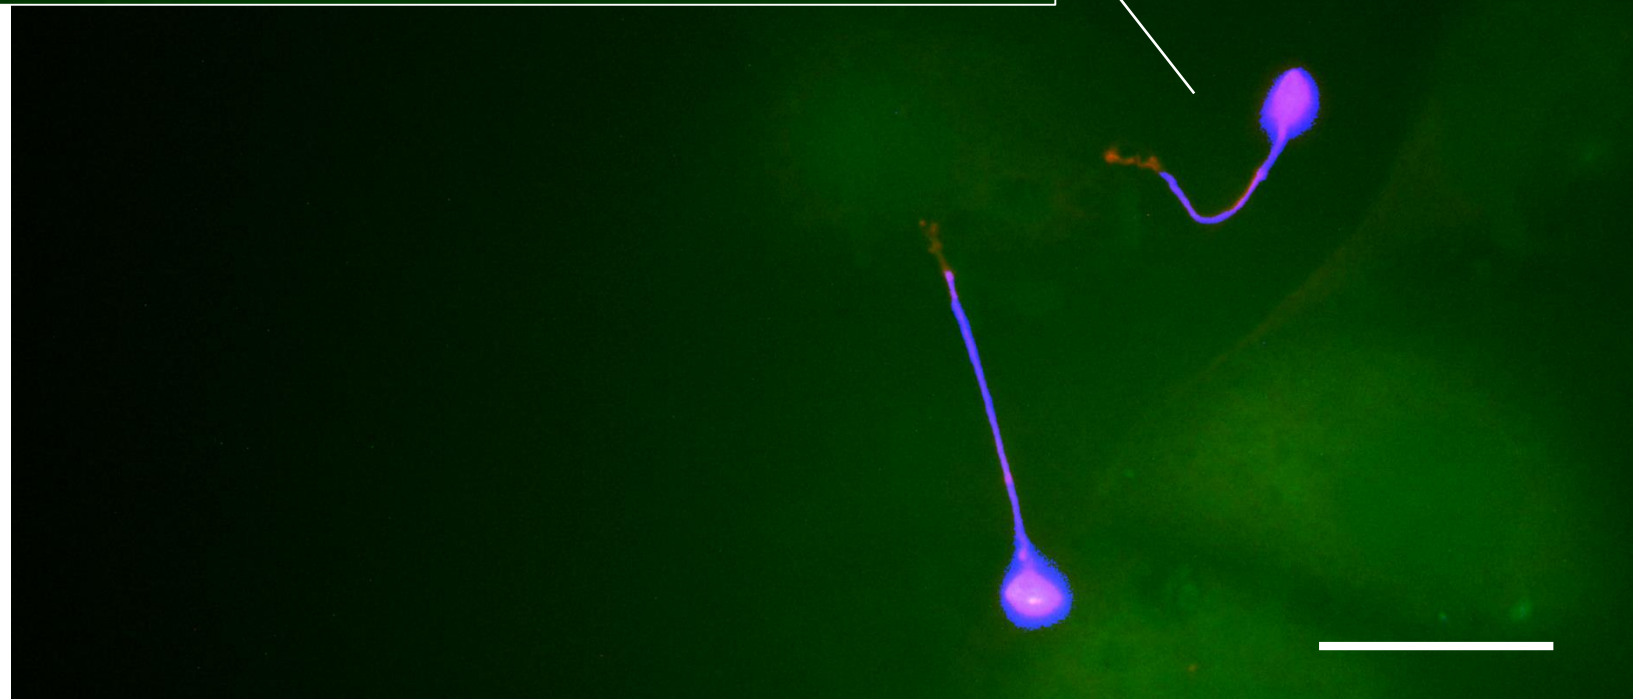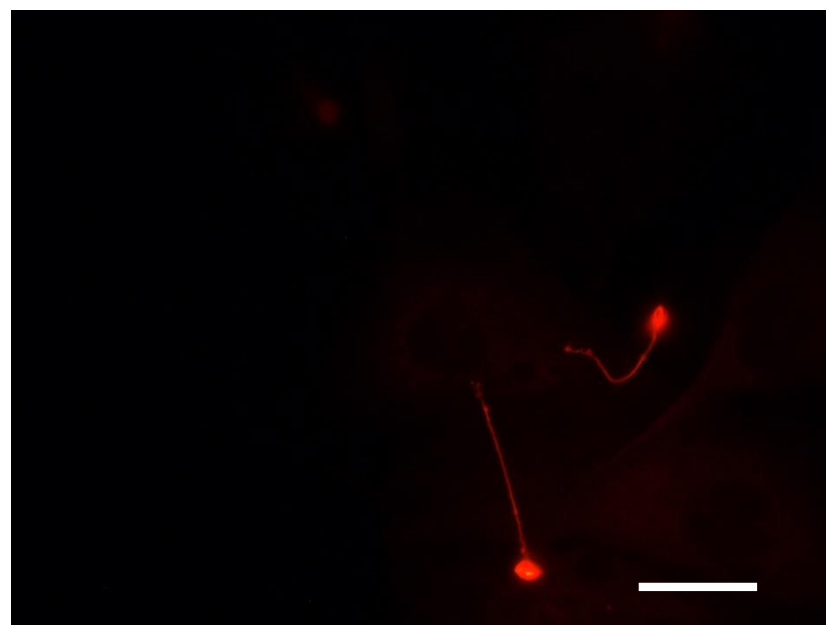

Figure 3C

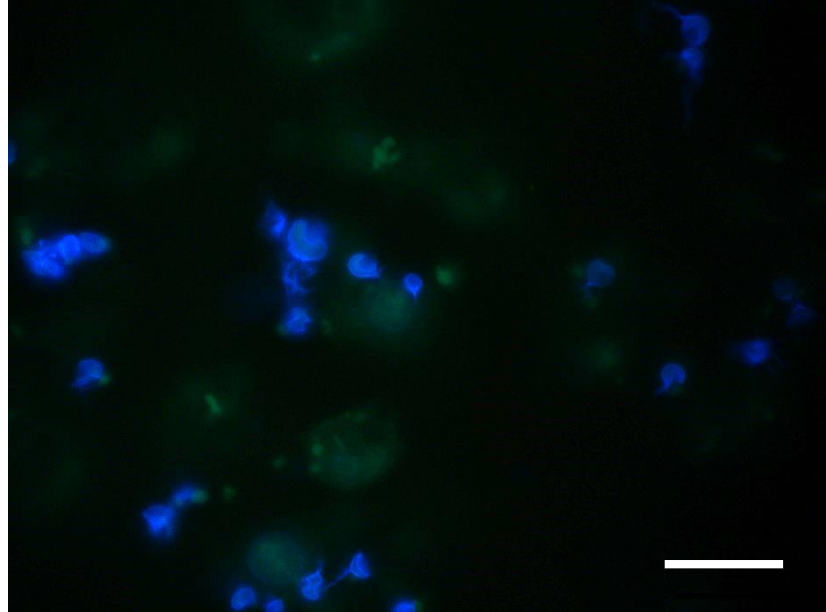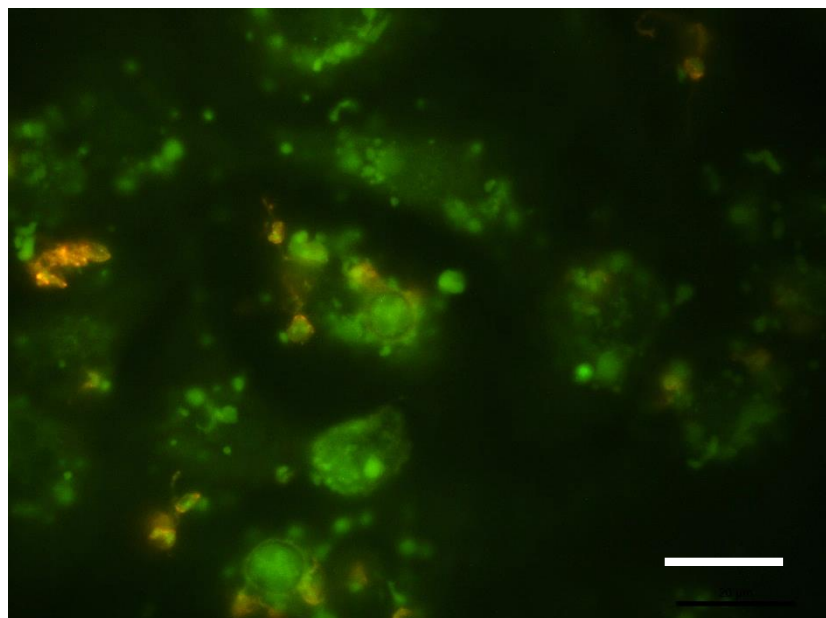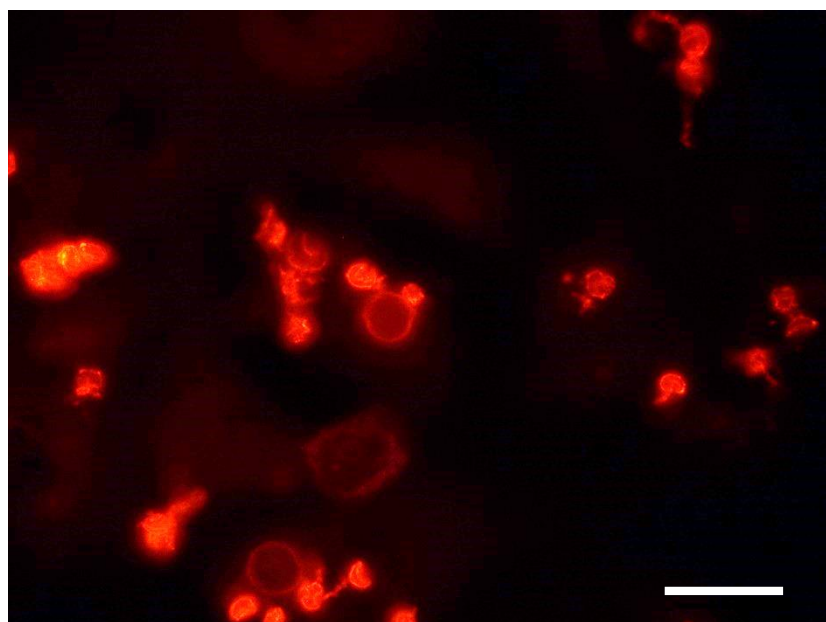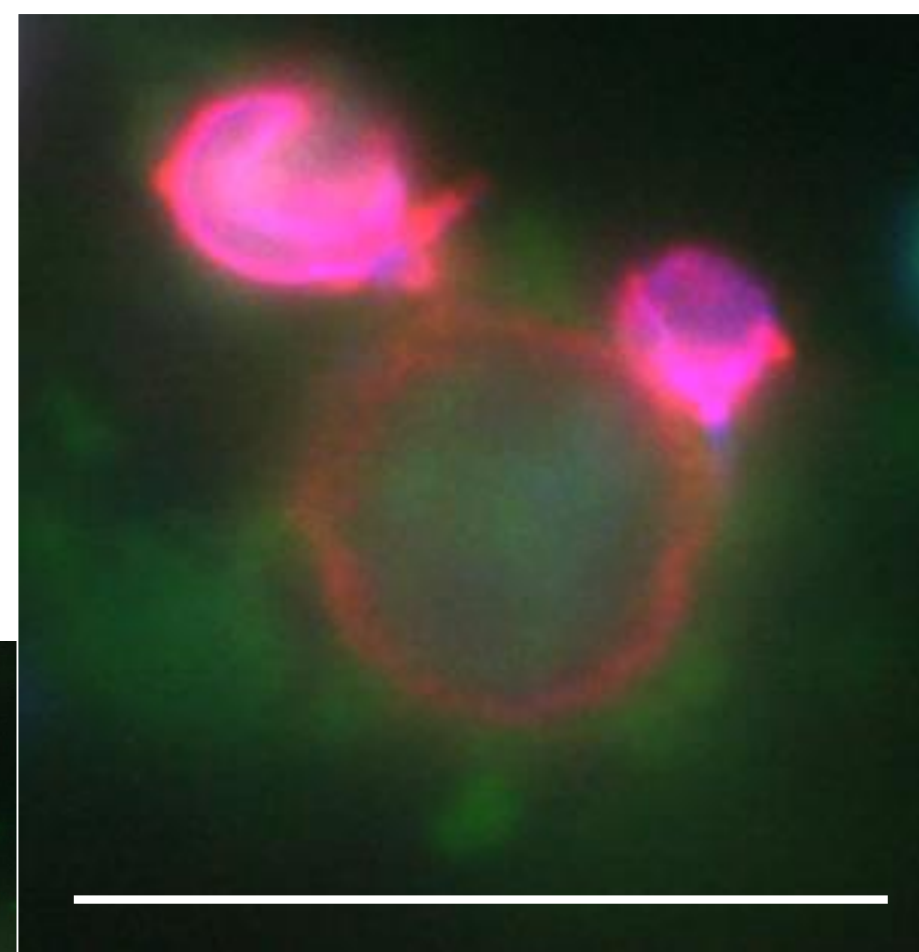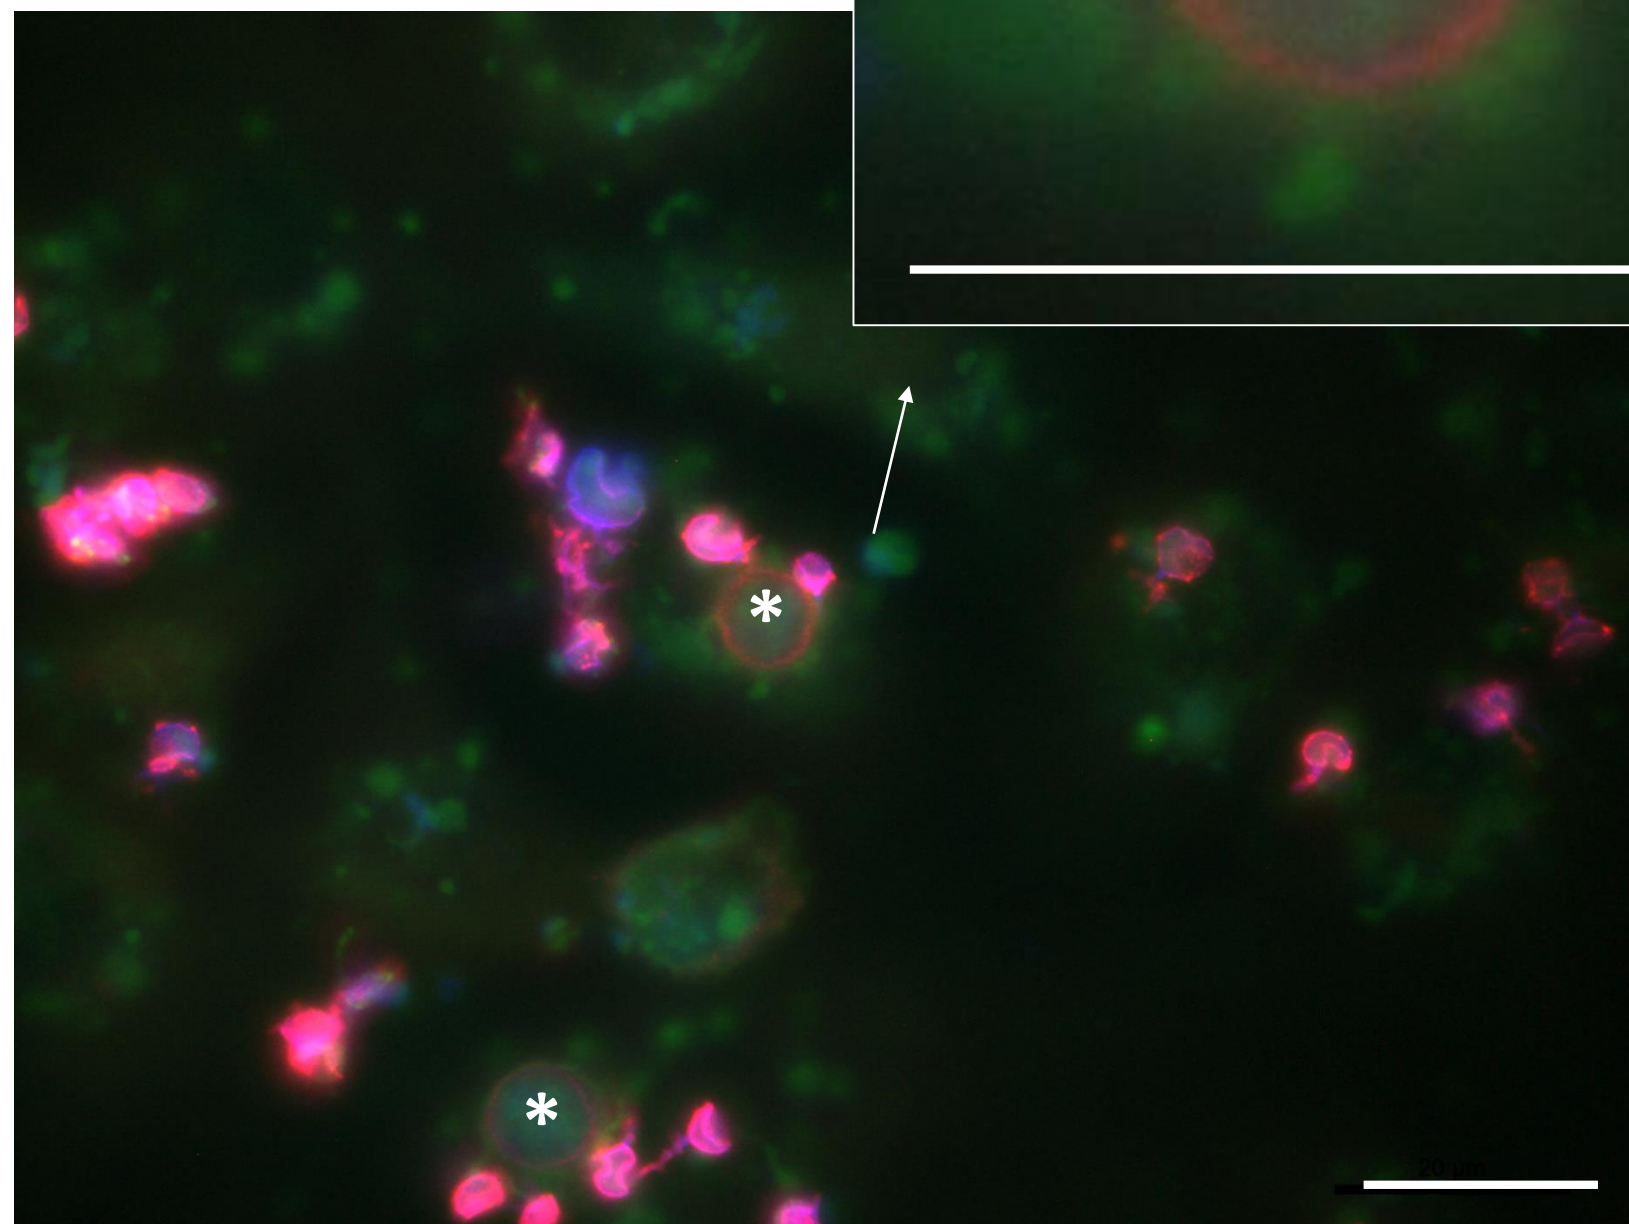

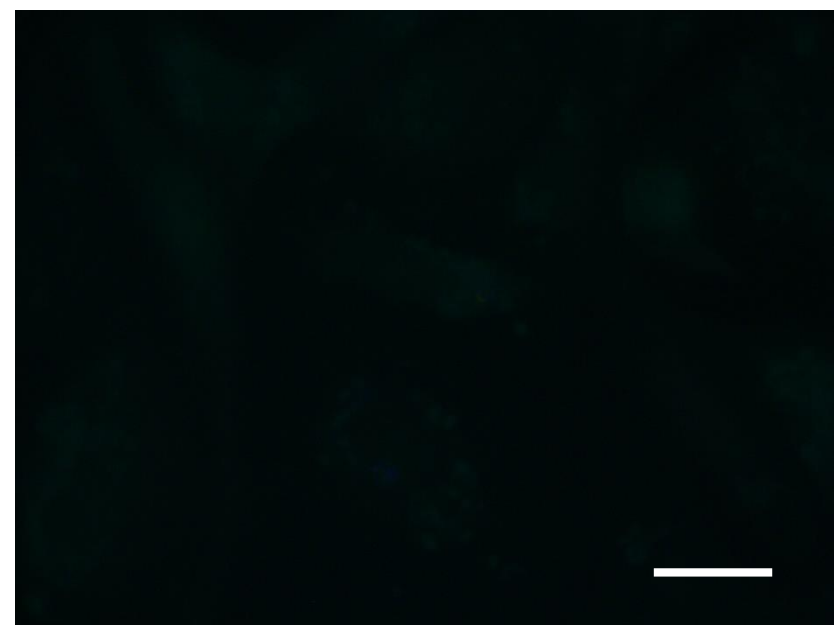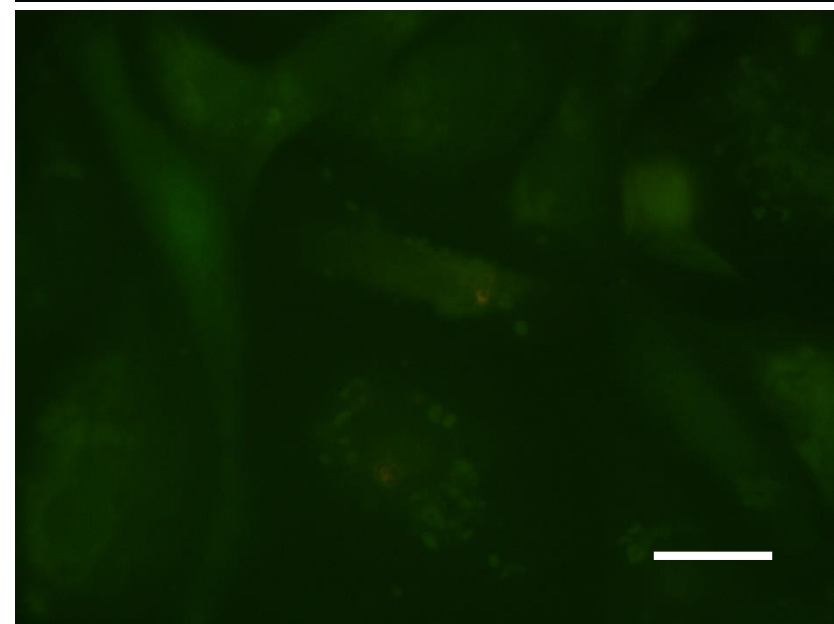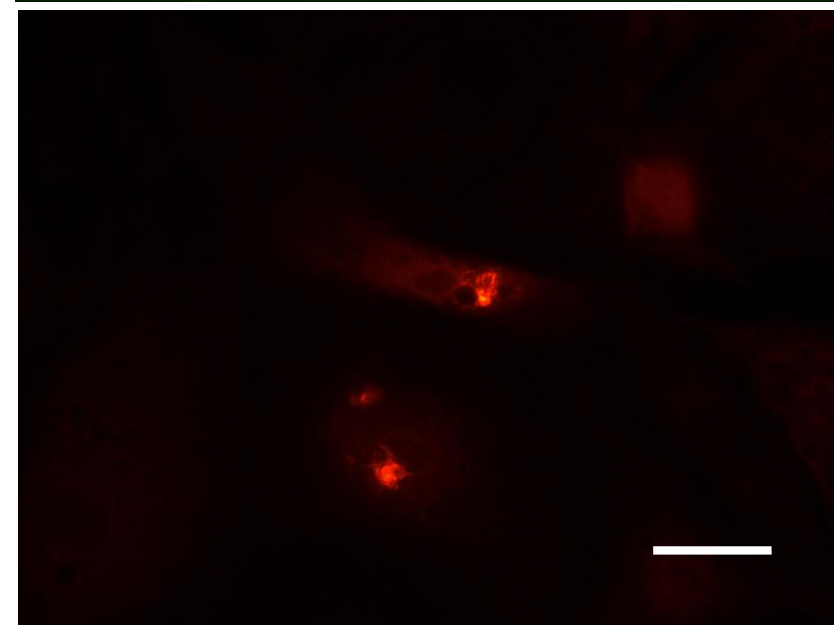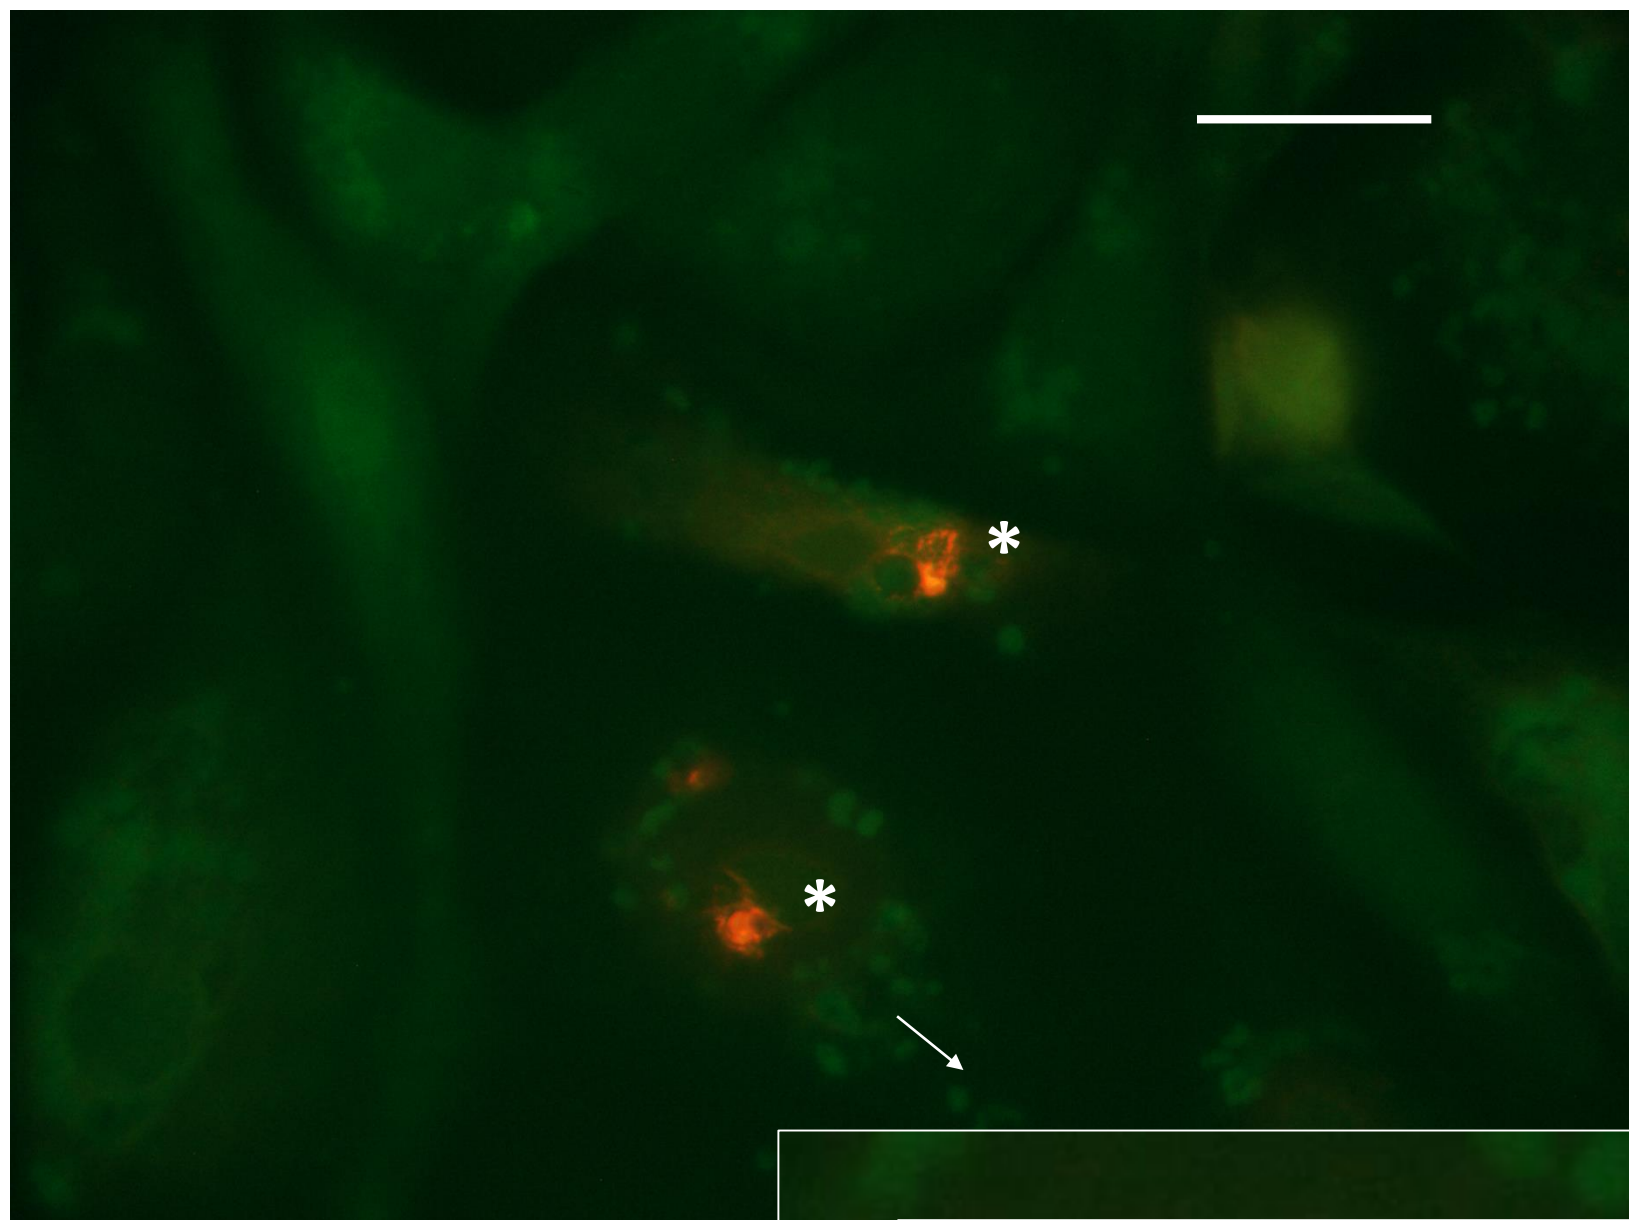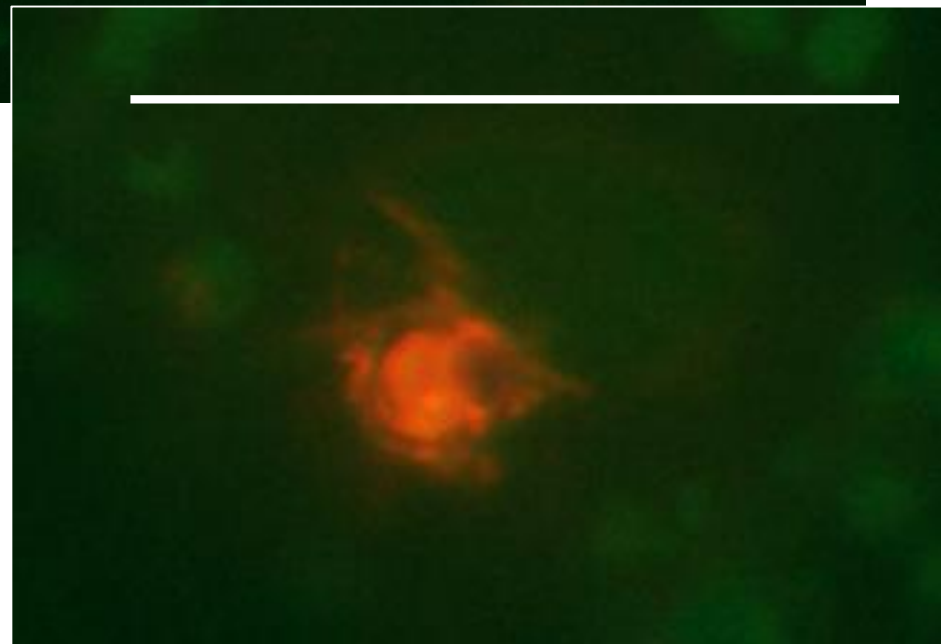

**Figure 3D**

Figure 3E

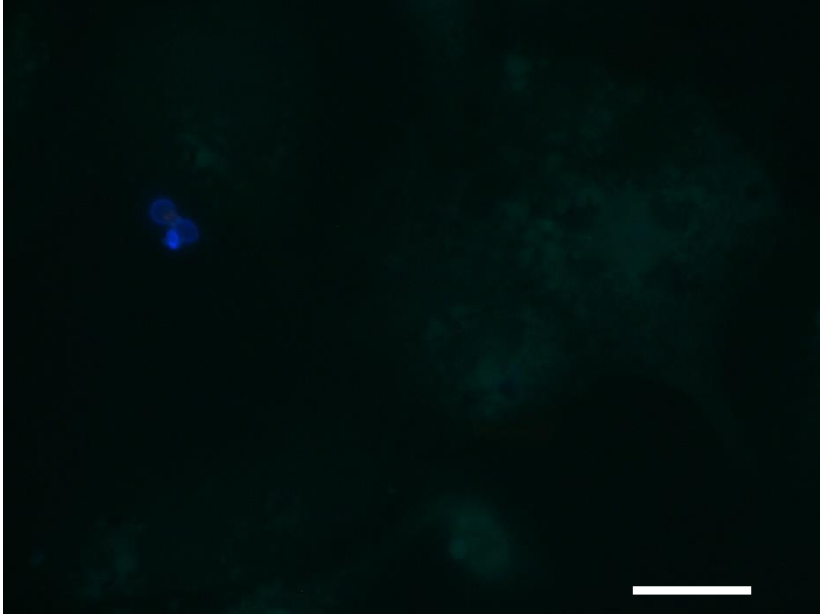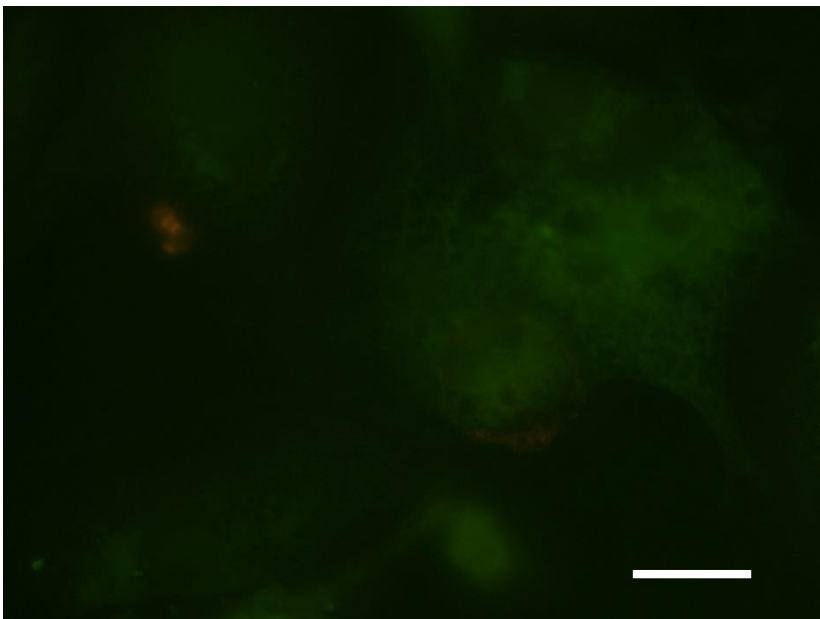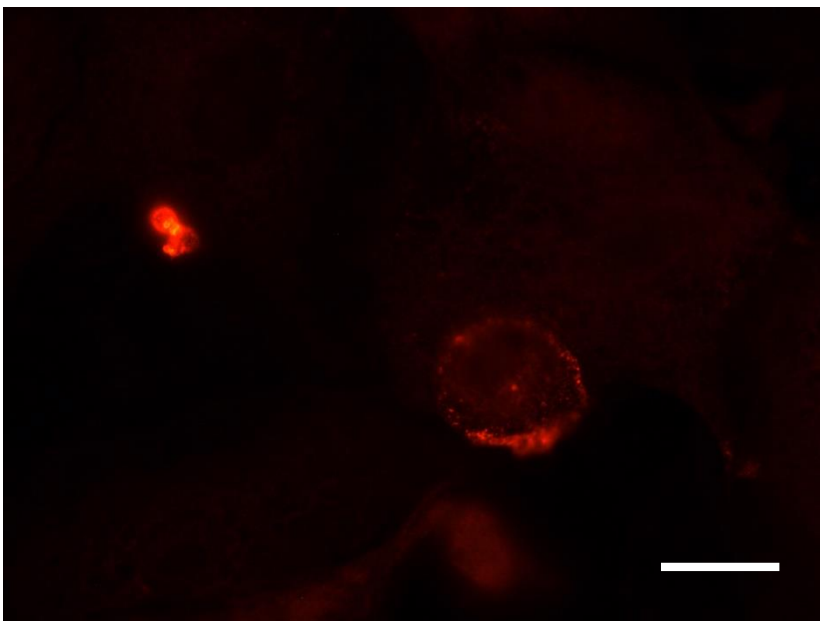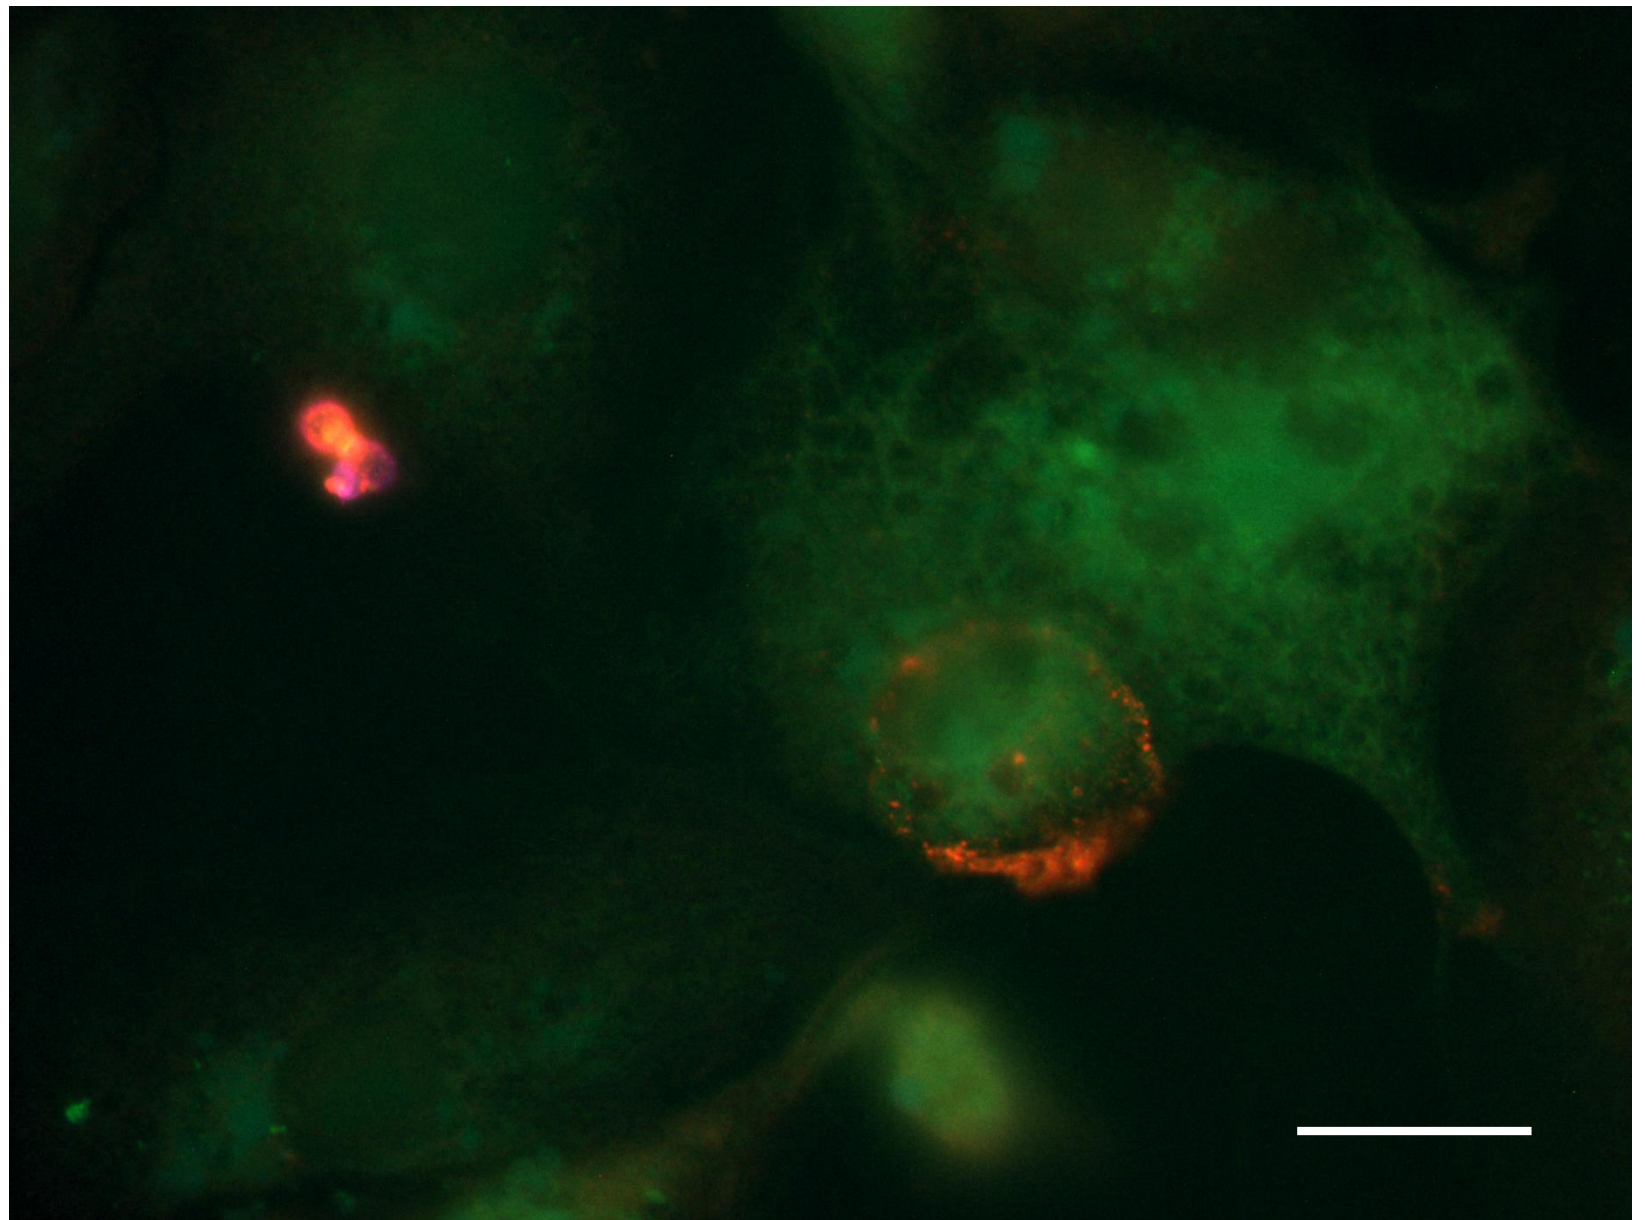

**Figure 3F**

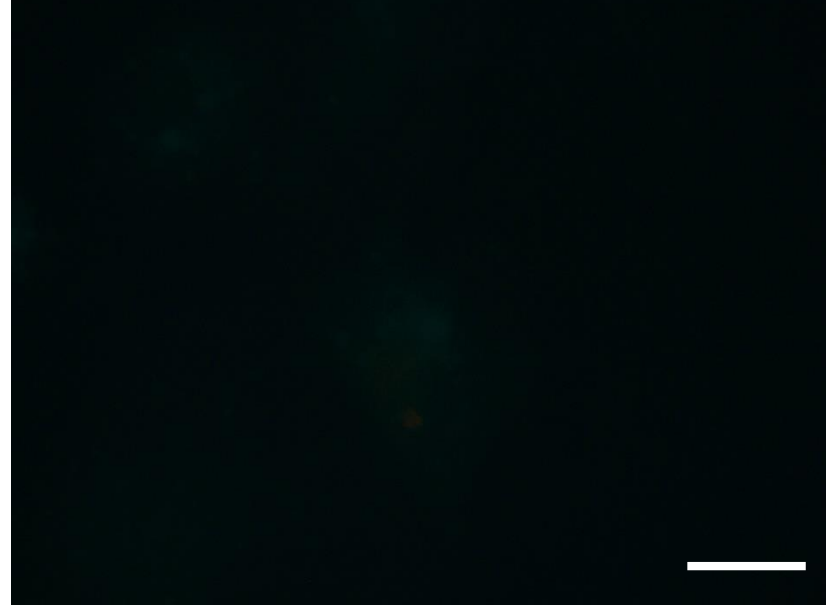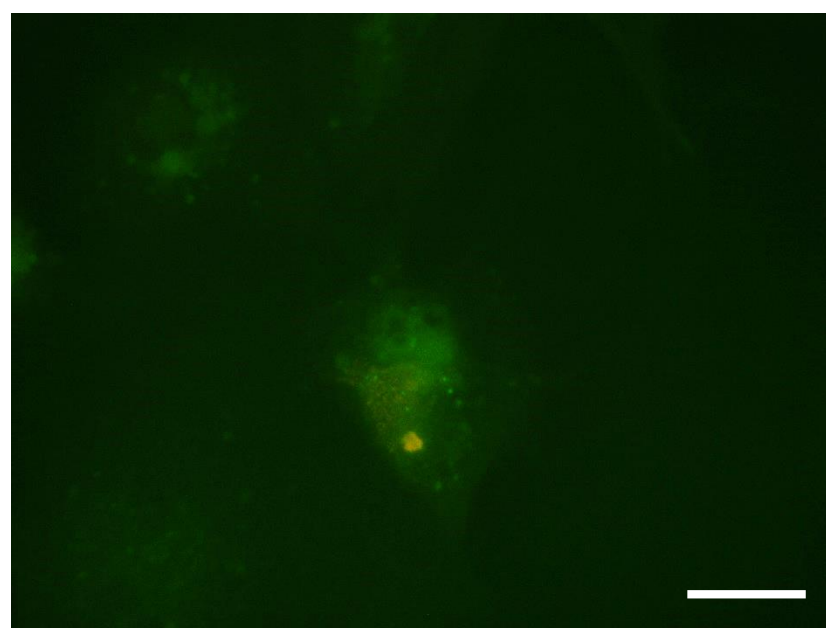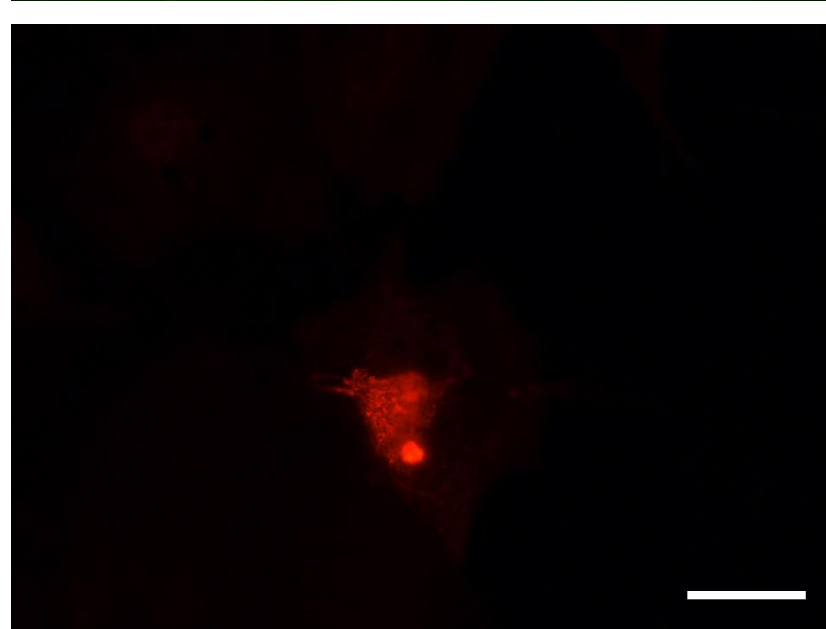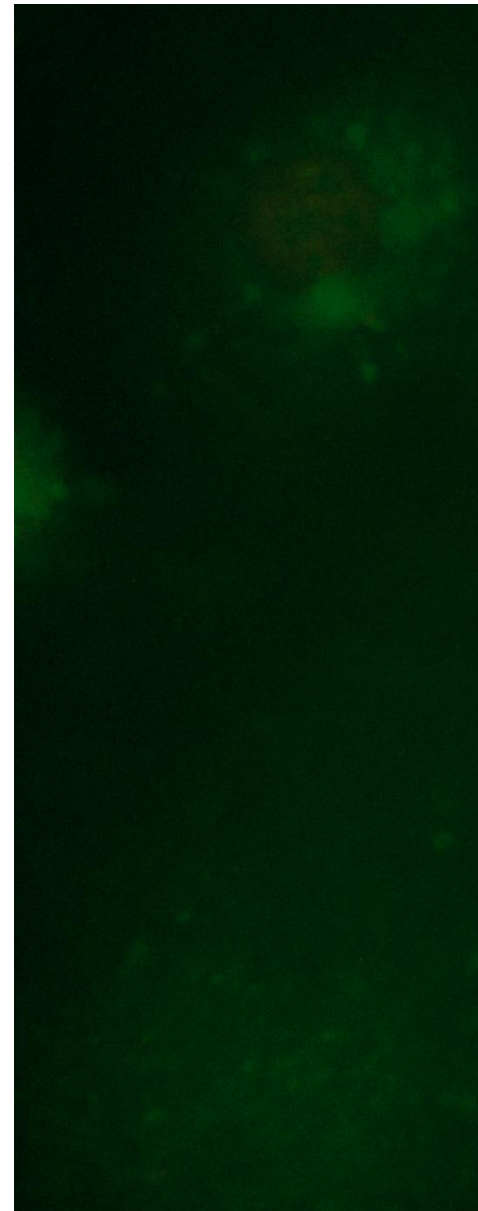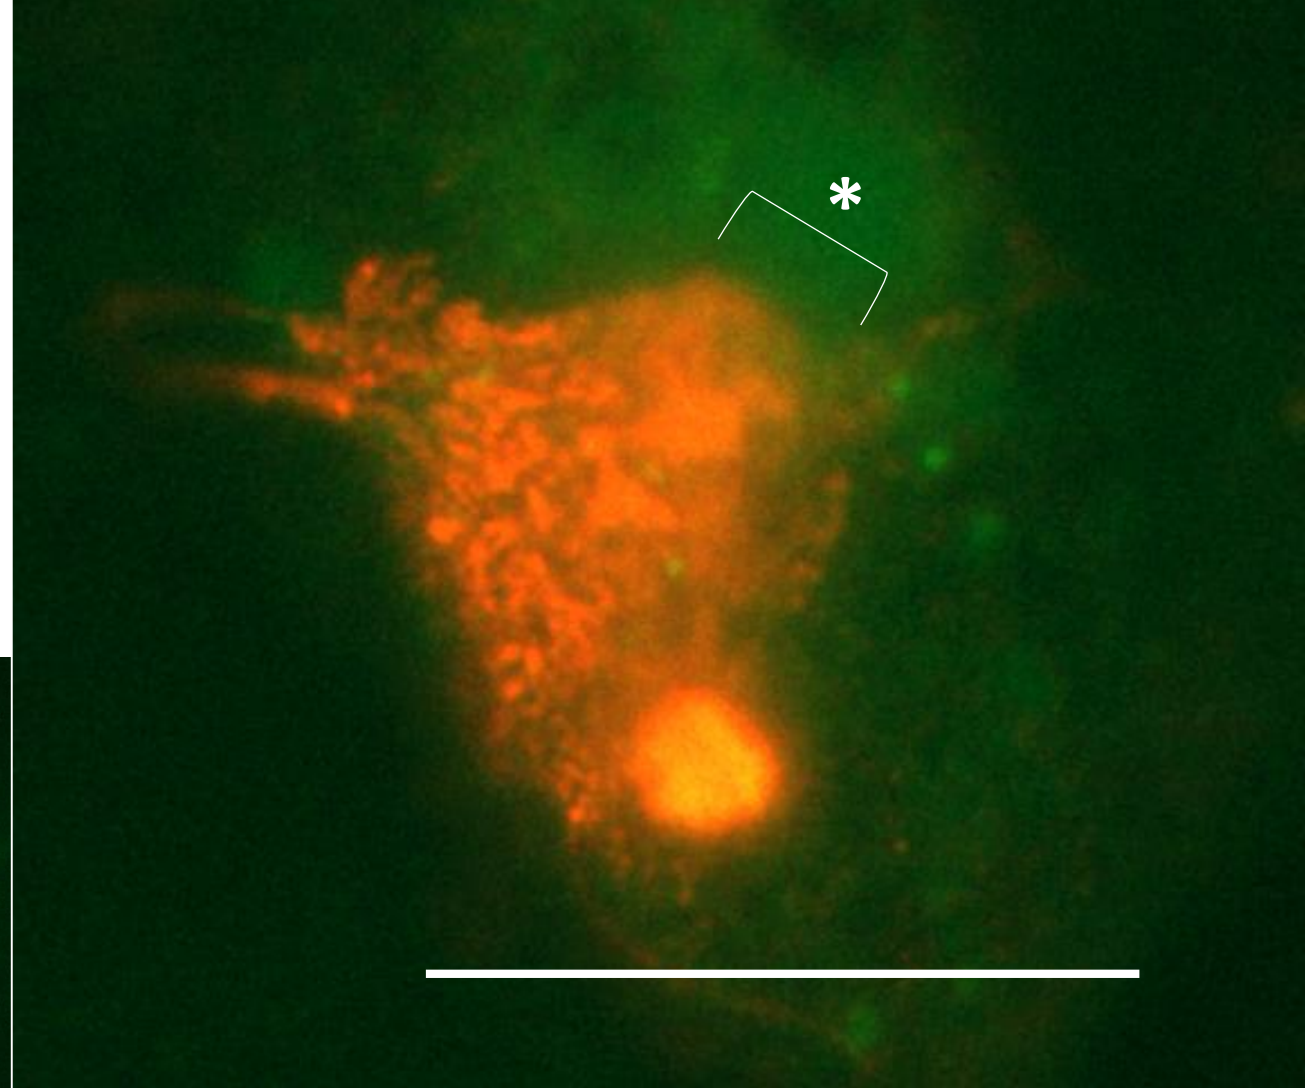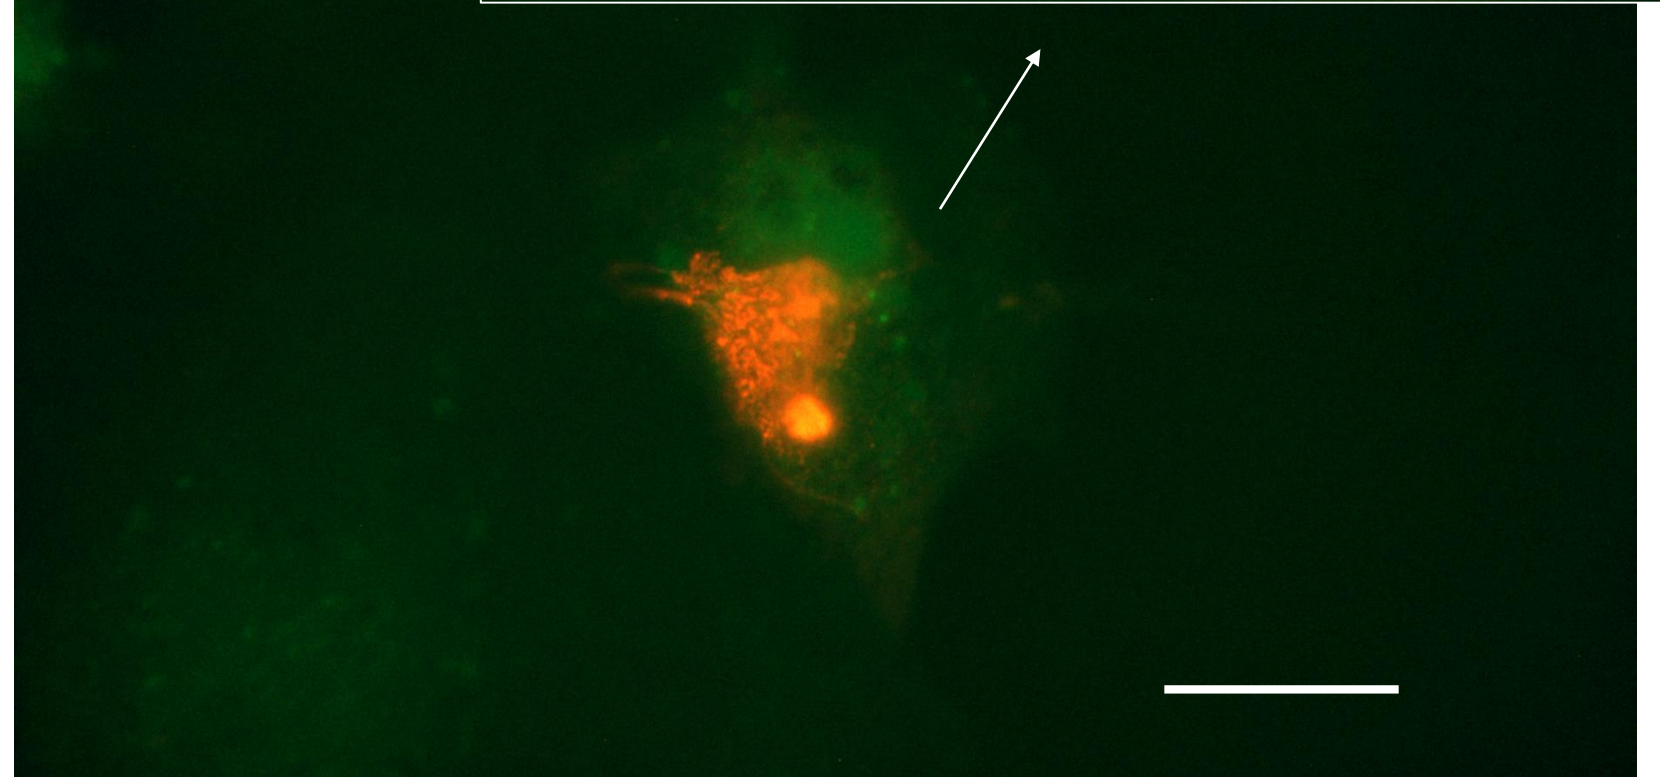

**Figure 3G**

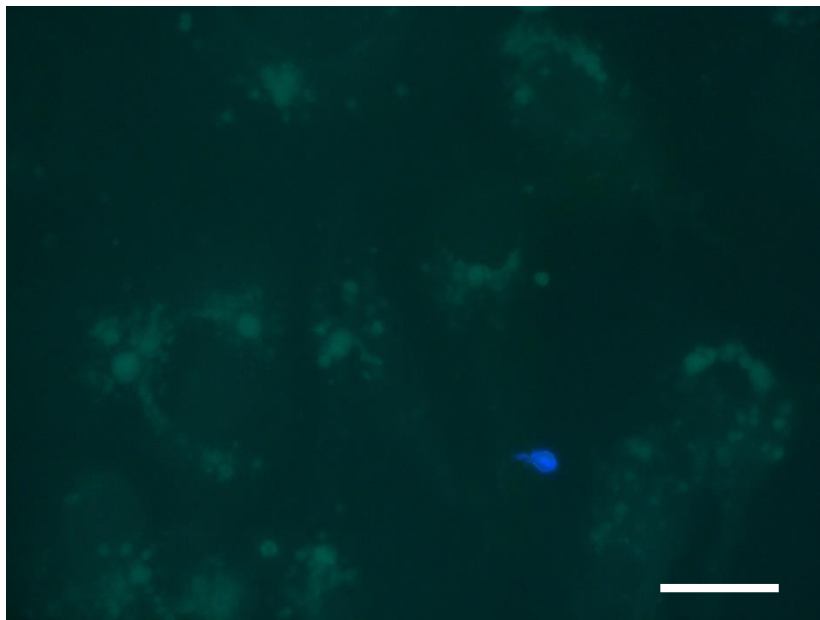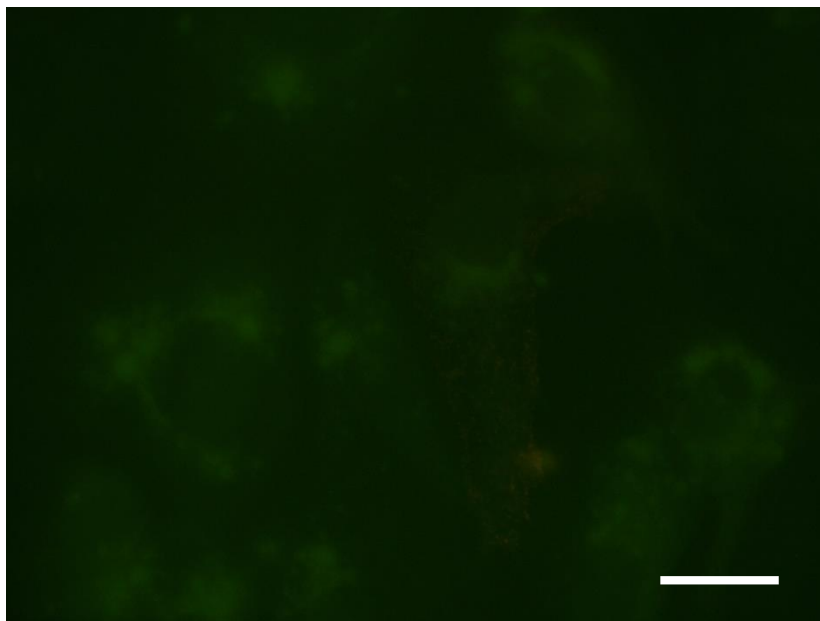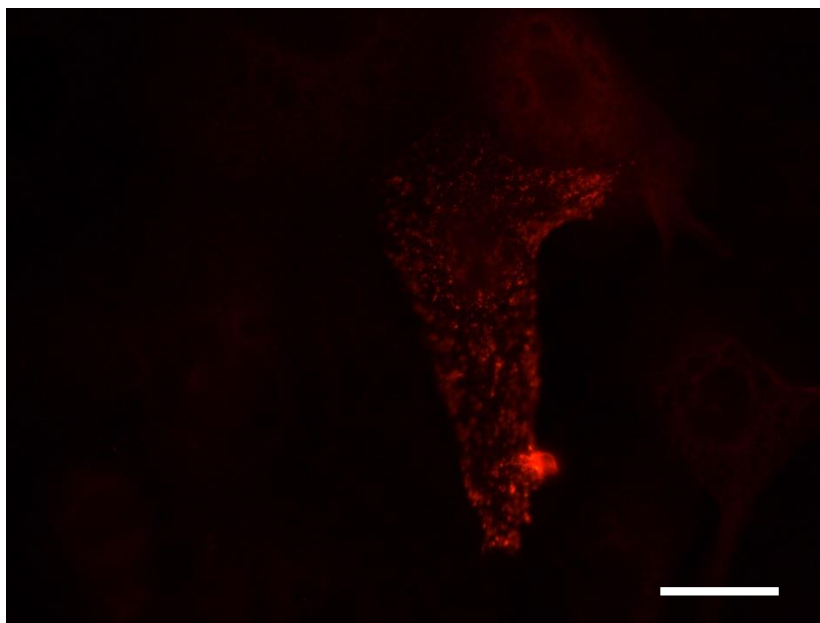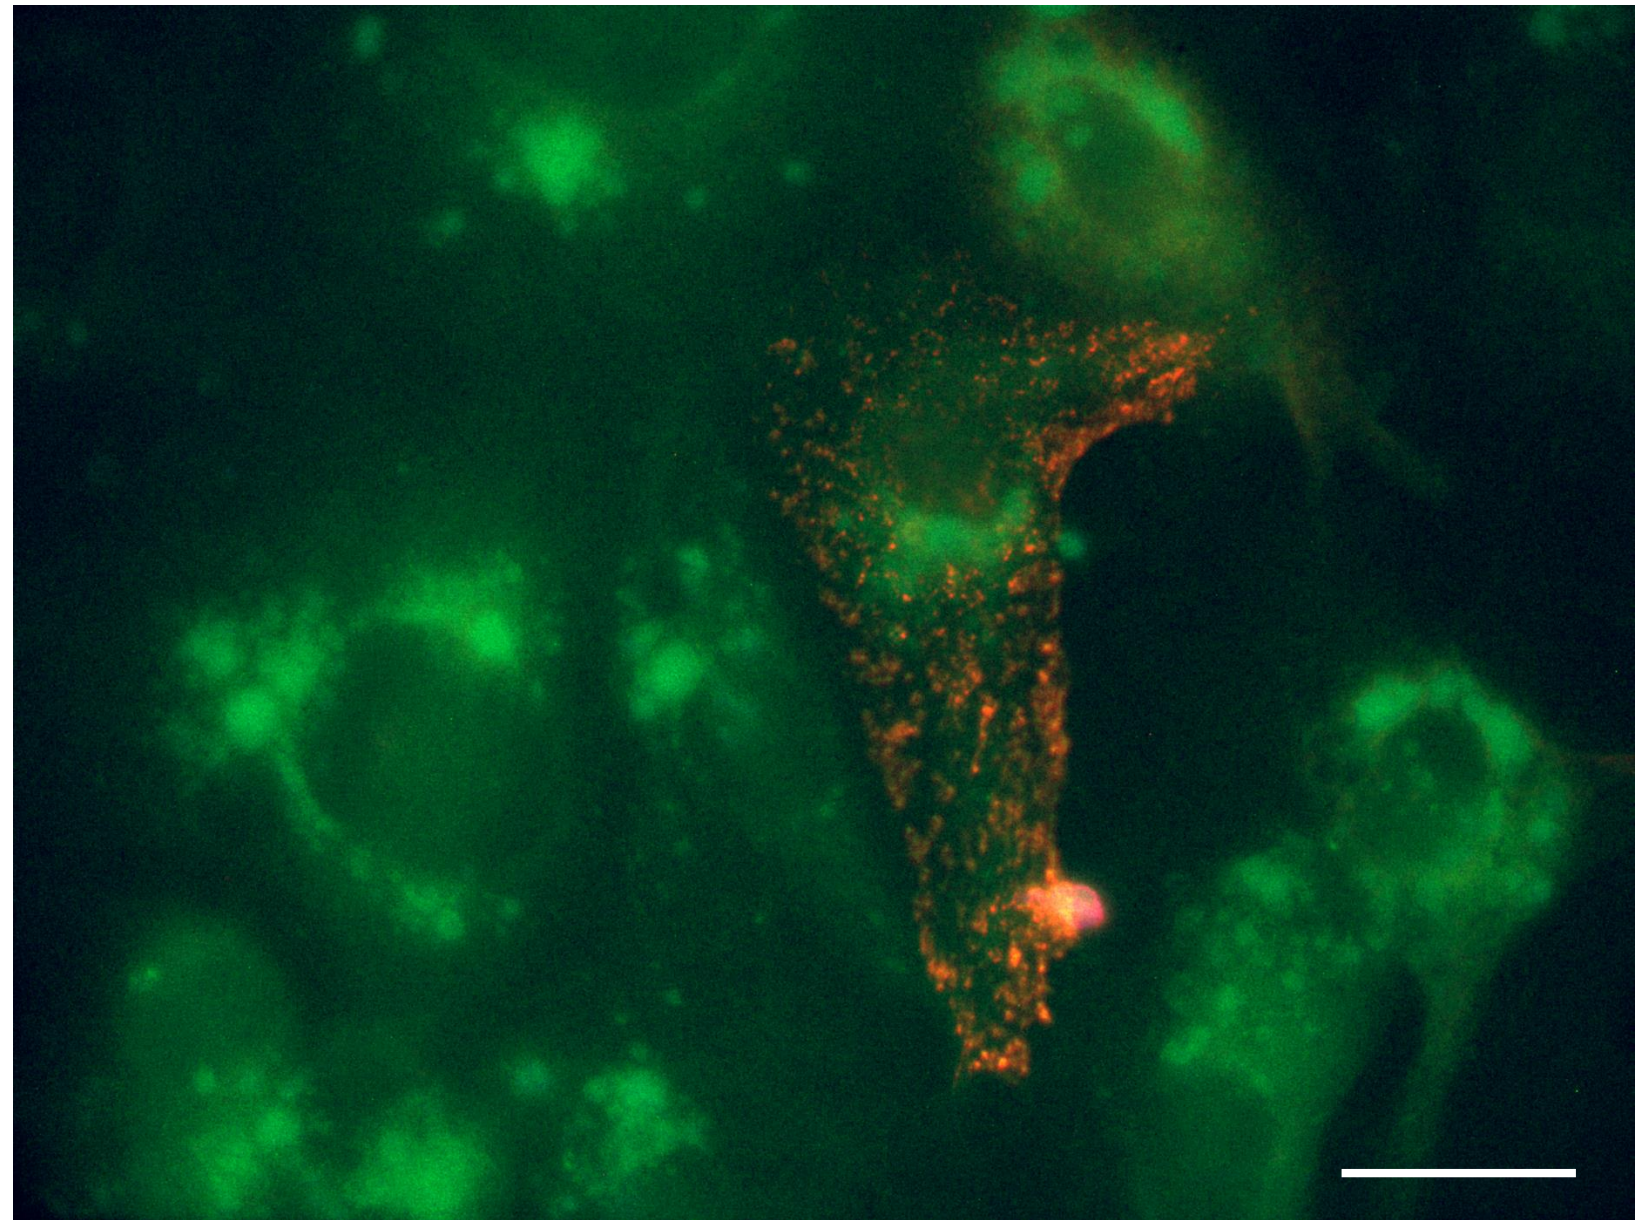

Supplement: pone.0225224.s003.pdf [file pone.0225224.s003.pdf]
