# Supplementary material for: In vitro modeling of Batrachochytrium dendrobatidis infection of the amphibian skin
Source: PubMed Central journal article supplement (PMC6855447; doi:10.1371/journal.pone.0225224), 2019-11-14

Figure 3H

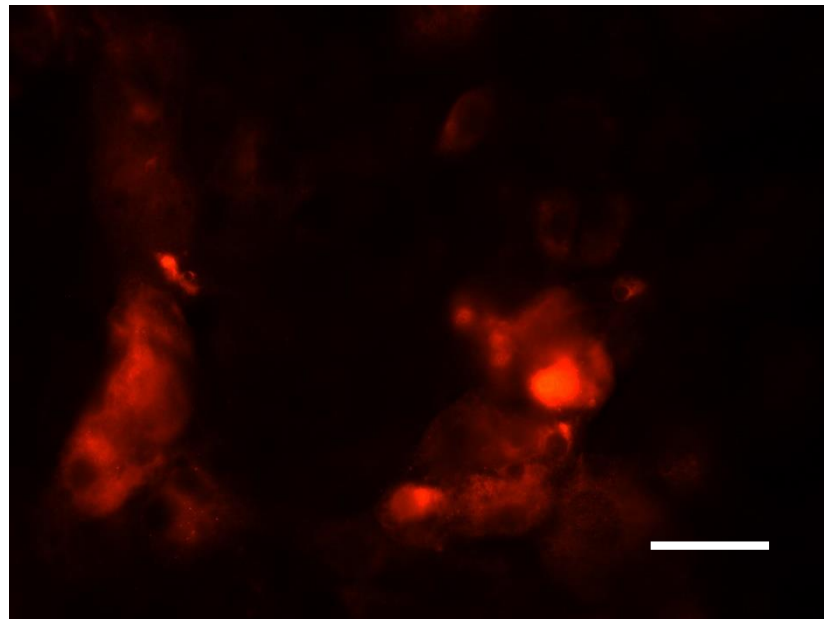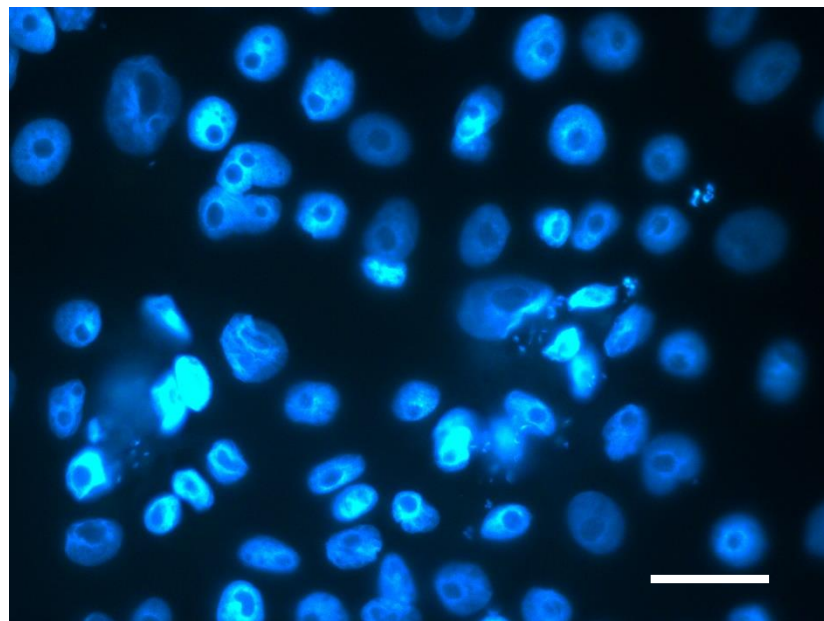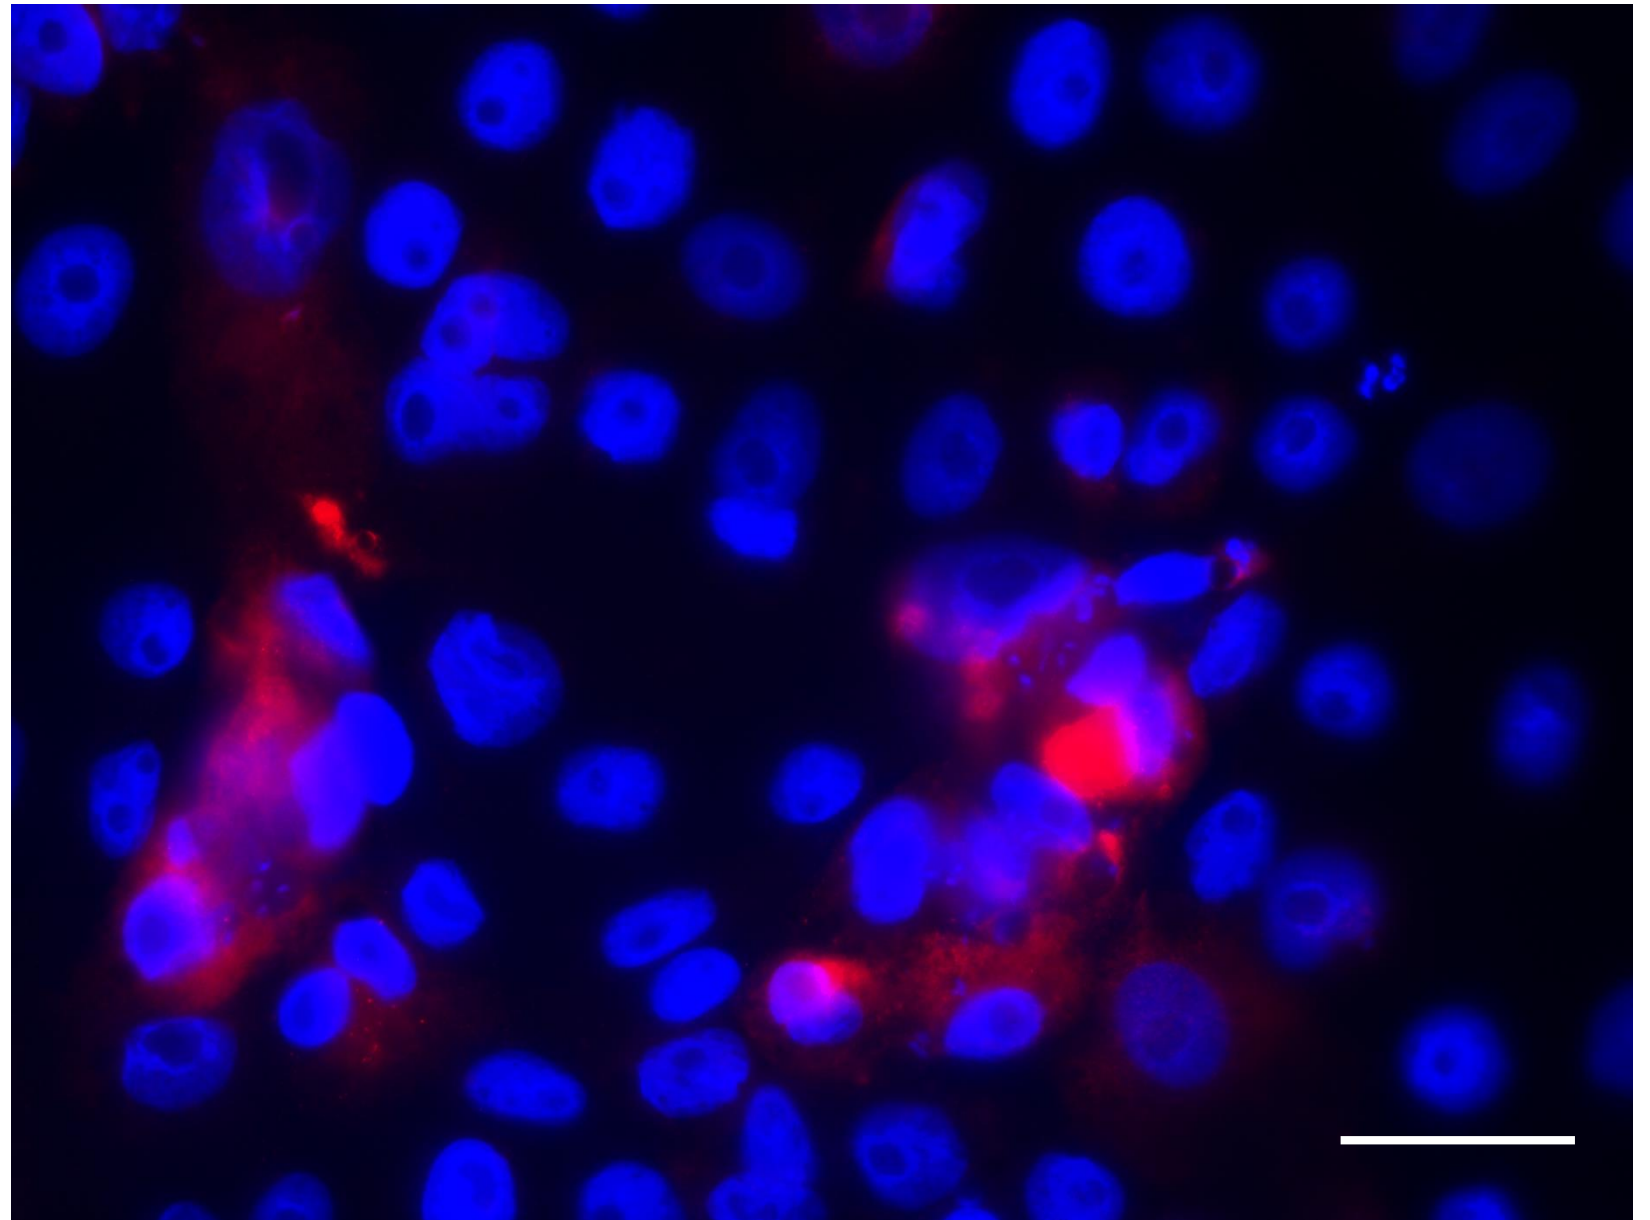

# Negative control day 5 sham infection

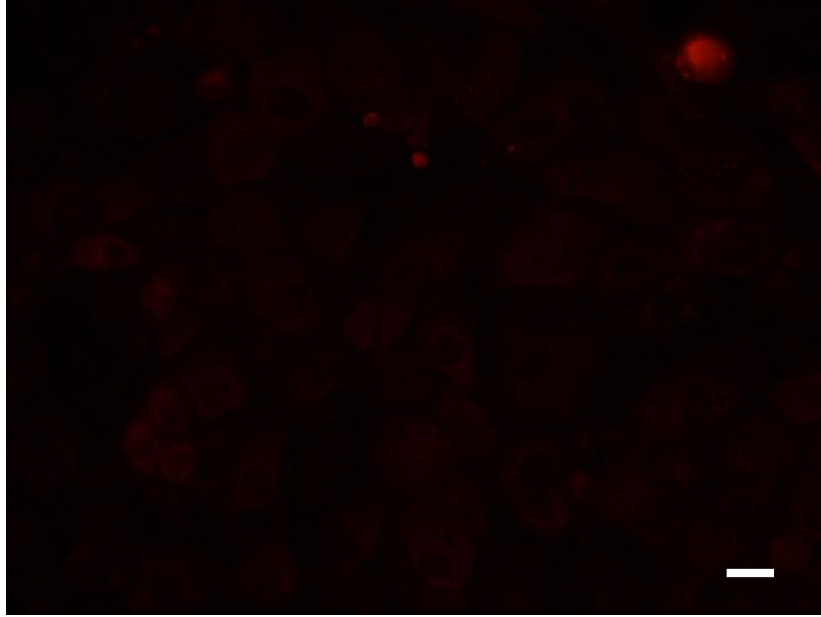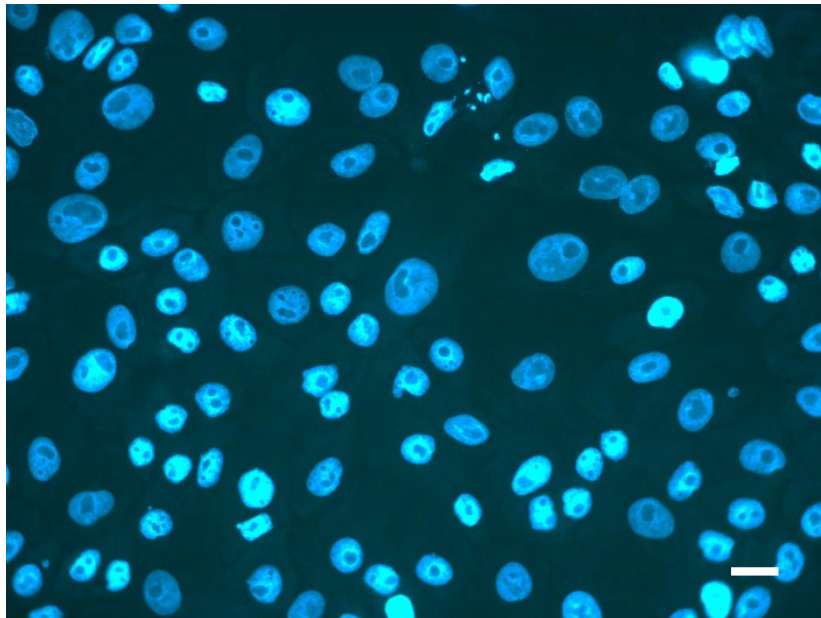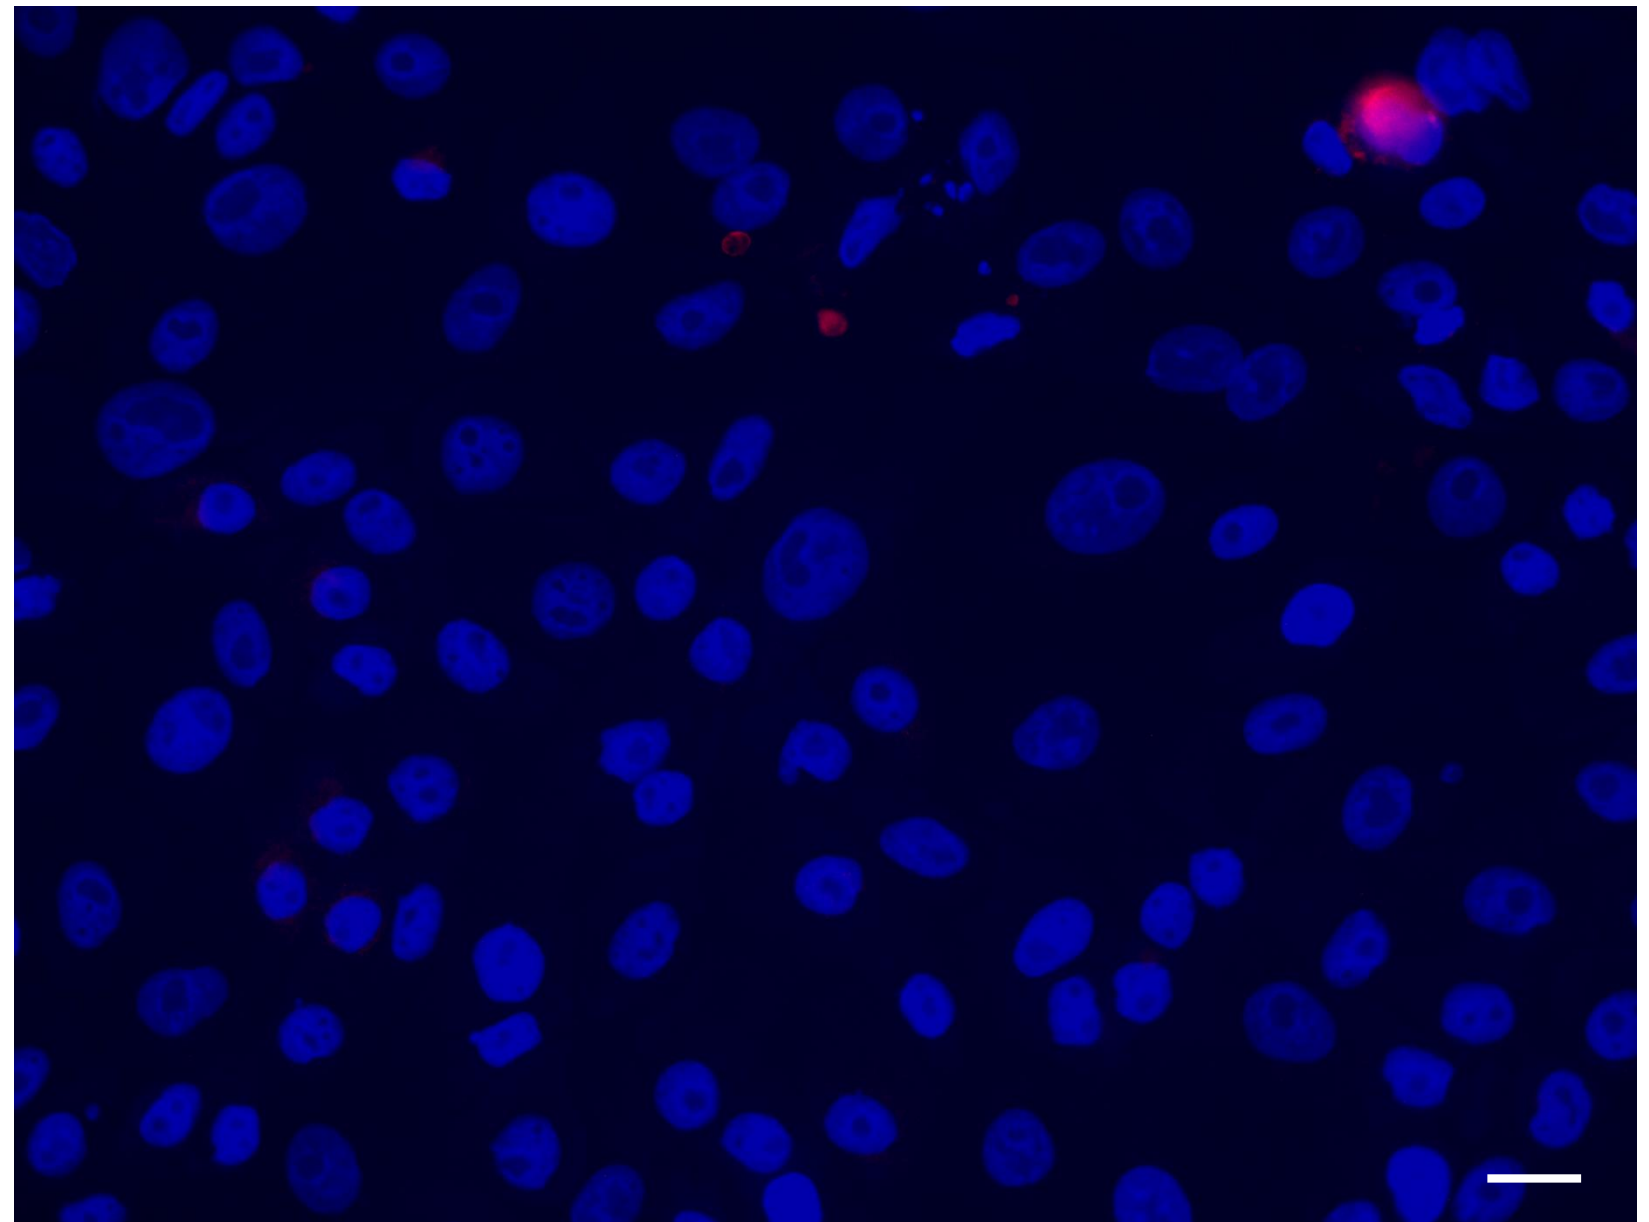

**Positive control day 5 sham infection**

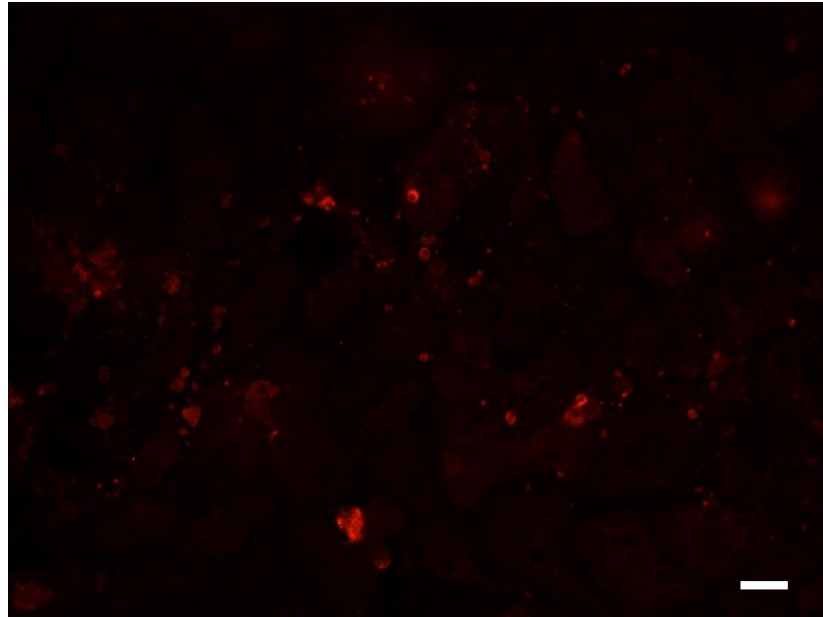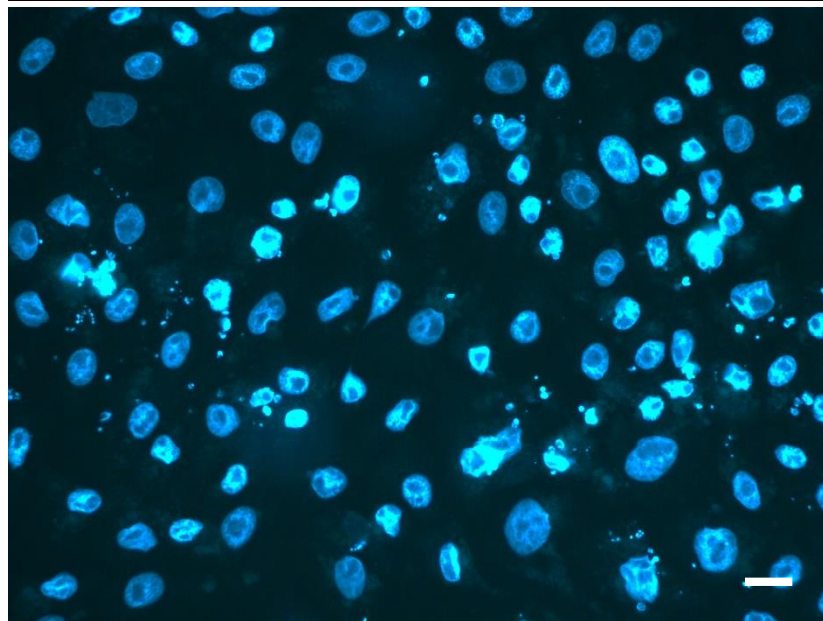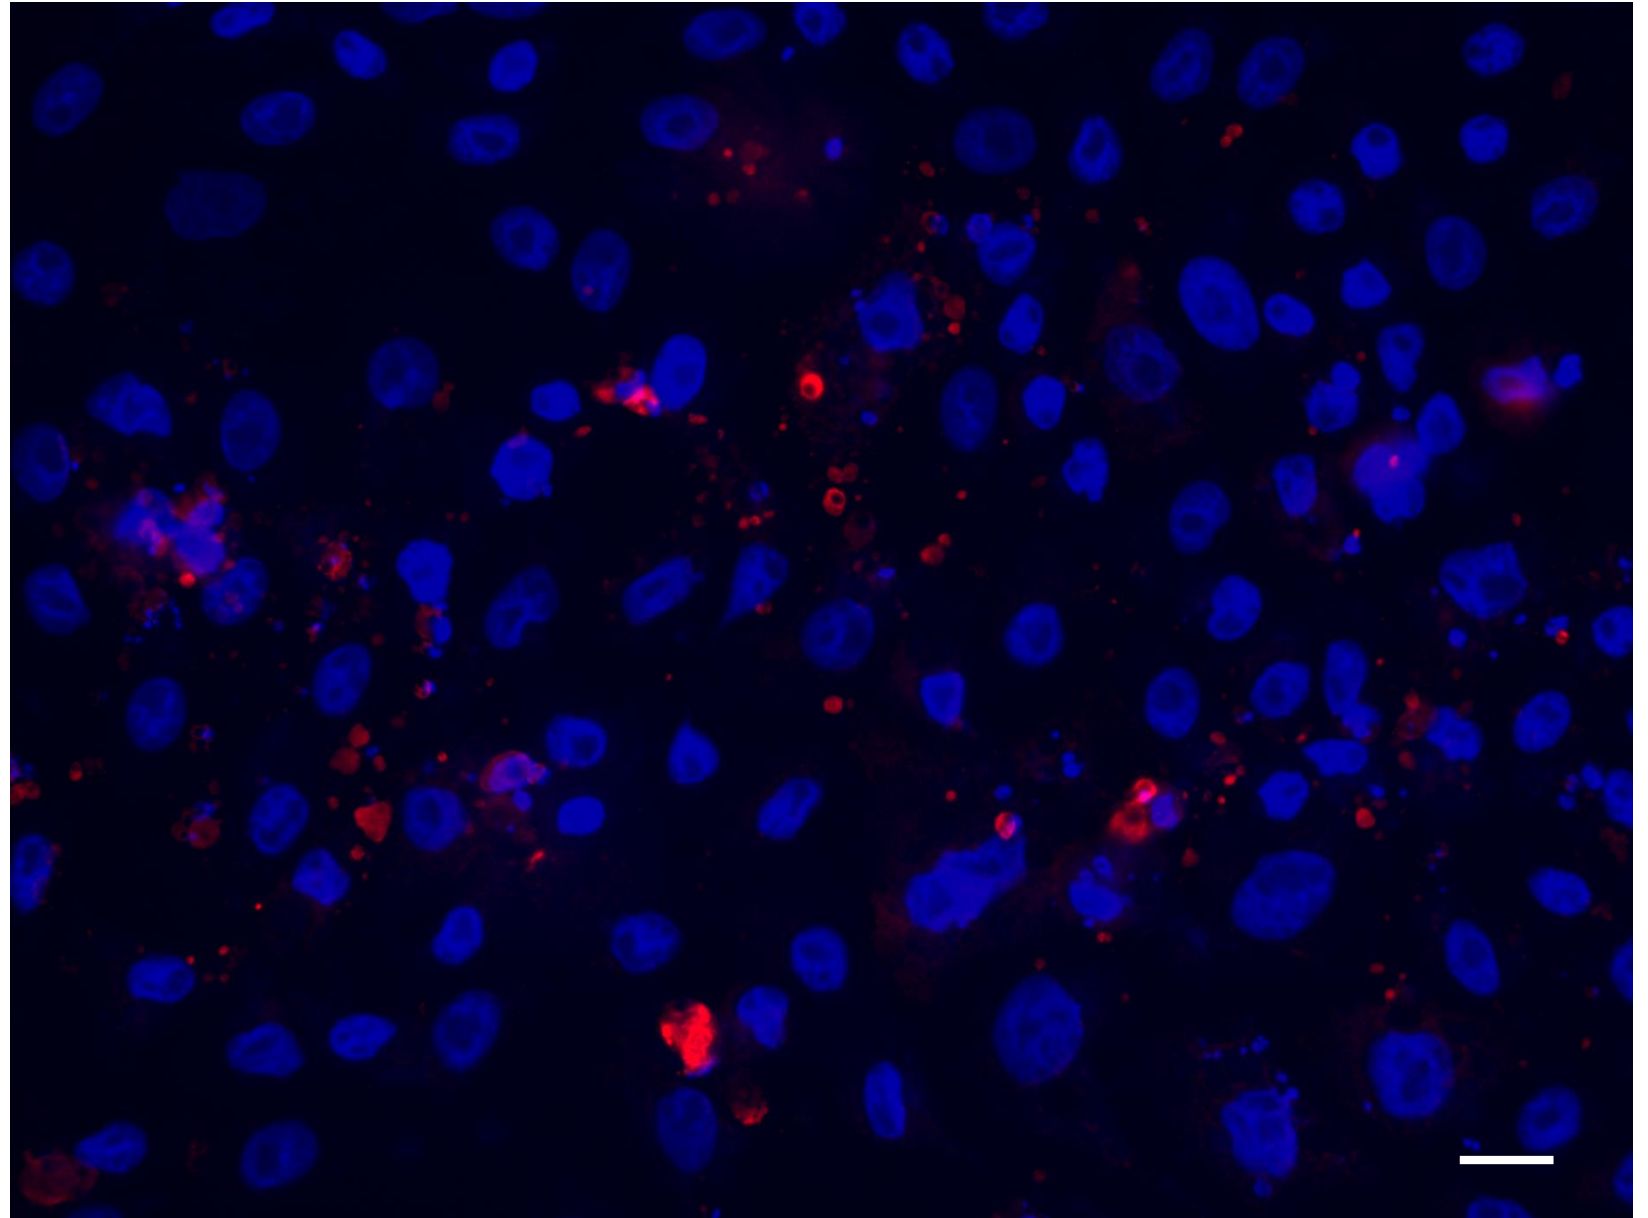

Supplement: pone.0225224.s002.pdf [file pone.0225224.s002.pdf]
